# Supplementary material for: Listeria monocytogenes infection rewires host metabolism with regulatory input from type I interferons
Source: PLoS Pathog. 2021 Jul 8;17(7):e1009697. doi: 10.1371/journal.ppat.1009697 (PMC8266069; doi:10.1371/journal.ppat.1009697)
Supplement: S1 Table — (XLSX) [file ppat.1009697.s007.xlsx]

## Sheet: Sheet1
	X	ID	Description	setSize	enrichmentScore	NES	pvalue	p.adjust	qvalues	rank	leading_edge	core_enrichment	setSize2	core_enrichment_symbols	Number_of_core_enriched	Genes_found_in_Pathway_setSize	Genes_of_Pathway	GeneRatio
1	HALLMARK_IL6_JAK_STAT3_SIGNALING	HALLMARK_IL6_JAK_STAT3_SIGNALING	HALLMARK_IL6_JAK_STAT3_SIGNALING	80	0.522579	1.94881	0.00189394	0.0115741	0.00730994	2094	tags=36%, list=11%, signal=32%	12986/12703/55985/21803/21937/16184/56066/16326/16161/15945/16177/18414/24088/15980/19246/16172/15979/16401/15368/16847/18712/12505/94185/16193/17874/12702/16362/15975/56324	80	Csf3r/Socs1/Cxcl13/Tgfb1/Tnfrsf1a/Il2ra/Cxcl11/Inhbe/Il12rb1/Cxcl10/Il1r1/Osmr/Tlr2/Ifngr2/Ptpn1/Il17ra/Ifngr1/Itga4/Hmox1/Lepr/Pim1/Cd44/Tnfrsf21/Il6/Myd88/Socs3/Irf1/Ifnar1/Stam2	29	Il1r2/Il1r1/Il18r1/Ifngr1/Stat2/Inhbe/Irf1/Pik3r5/Ccl7/Itgb3/Stat3/Grb2/Socs3/Il6st/Il3ra/Irf9/Il17rb/Acvrl1/Acvr1b/Osmr/Csf2rb2/Ifnar1/Ifngr2/Socs1/Pim1/Ltb/Tnfrsf21/Ebi3/Tnfrsf12a/Bak1/Tnf/Map3k8/Cd14/Ptpn2/Fas/Dntt/Csf2ra/Il2ra/Il15ra/Itga4/Ptpn1/Stam2/Cd44/Il1b/Pdgfc/Il7/Tlr2/Hax1/Csf1/Lepr/Csf3r/Cntfr/Jun/Tnfrsf1b/Il6/Cd38/Pf4/Cxcl1/Cxcl2/Cxcl13/Cd36/Cxcl9/Cxcl10/Cxcl11/Crlf2/Ptpn11/Il17ra/A…	Apoh/App/Ccnd2/Col3a1/Col5a2/Cxcl5/Fgfr1/Fstl1/Itgav/Jag1/Jag2/Kcnj8/Lpl/Lrpap1/Lum/Msx1/Nrp1/Olr1/Pdgfa/Pf4/Pglyrp1/Postn/Prg2/Ptk2/S100a4/Serpina5/Slco2a1/Spp1/Stc1/Thbd/Timp1/Tnfrsf21/Vav2/Vcan/Vegfa/Vtn	0.3625
2	HALLMARK_MYC_TARGETS_V2	HALLMARK_MYC_TARGETS_V2	HALLMARK_MYC_TARGETS_V2	55	0.55883	1.94046	0.00195312	0.0115741	0.00730994	4379	tags=49%, list=24%, signal=37%	20810/338359/101612/15278/66942/72515/110109/53414/56361/235036/22256/17869/67134/53608/70769/18817/17217/67973/100608/30877/70683/21379/226169/69071/15277/68493/66590	55	Srm/Supv3l1/Grwd1/Tfb2m/Ddx18/Wdr43/Nop2/Bysl/Pus1/Ppan/Ung/Myc/Nop56/Map3k6/Nolc1/Plk1/Mcm4/Mphosph10/Noc4l/Gnl3/Utp20/Tbrg4/Pprc1/Tmem97/Hk2/Ndufaf4/Farsa	27	Imp4/Hspe1/Hspd1/Ddx18/Tfb2m/Slc19a1/Cdk4/Supv3l1/Utp20/Pes1/Mybbp1a/Phb/Tbrg4/Npm1/Tmem97/Nop16/Gnl3/Ipo4/Myc/Mcm4/Wdr43/Bysl/Tcof1/Slc29a2/Rcl1/Pprc1/Nolc1/Rrp12/Sord/Dusp2/Nop56/Rabepk/Plk4/Ndufaf4/Map3k6/Srm/Mrto4/Ung/Noc4l/Pus1/Aimp2/Cbx3/Nop2/Hk2/Exosc5/Plk1/Grwd1/Mphosph10/Dctpp1/Mcm5/Farsa/Nip7/Ppan/Rrp9/Las1l	Apoh/App/Ccnd2/Col3a1/Col5a2/Cxcl5/Fgfr1/Fstl1/Itgav/Jag1/Jag2/Kcnj8/Lpl/Lrpap1/Lum/Msx1/Nrp1/Olr1/Pdgfa/Pf4/Pglyrp1/Postn/Prg2/Ptk2/S100a4/Serpina5/Slco2a1/Spp1/Stc1/Thbd/Timp1/Tnfrsf21/Vav2/Vcan/Vegfa/Vtn	0.490909
3	HALLMARK_INTERFERON_GAMMA_RESPONSE	HALLMARK_INTERFERON_GAMMA_RESPONSE	HALLMARK_INTERFERON_GAMMA_RESPONSE	193	-0.53543	-2.26878	0.00196078	0.0115741	0.00730994	1571	tags=27%, list=9%, signal=25%	70110/109032/14964/20306/56791/21354/667977/64685/66307/71586/667034/667373/243771/14129/19186/69550/15007/19039/71664/17069/12367/109552/58203/16912/231712/12515/21930/108670/100038882/66988/12226/15040/15958/15013/12010/231655/246727/17858/15018/16391/22169/52668/24110/55932/209086/66141/234311/327959/54123/80861/15959/99899/58185	193	Ifi35/Sp110/H2-D1/Ccl7/Ube2l6/Tap1/Gm8909/Nmi/Isoc1/Ifih1/Pnp2/Ifit1bl1/Parp12/Fcgr1/Psme1/Bst2/H2-Q10/Lgals3bp/Mettl7b/Ly6e/Casp3/Sri/Zbp1/Psmb9/Trafd1/Cd69/Tnfaip6/Epsti1/Isg15/Lap3/Btg1/H2-T23/Ifit2/H2-Q2/B2m/Oasl1/Oas3/Mx2/H2-Q7/Irf9/Cmpk2/Ifi27/Usp18/Gbp3/Samd9l/Ifitm3/Ddx60/Xaf1/Irf7/Dhx58/Ifit3/Ifi44/Rsad2	53	Casp8/Ptgs2/Selp/Sp110/St8sia4/Cfh/Pla2g4a/Xcl1/Slamf7/Btg1/Stat2/Tnfaip3/Arid5b/Mettl7b/Upp1/Peli1/Pnpt1/Lcp2/Irf1/Rapgef6/Xaf1/Ccl7/Ccl12/Trim25/Ifi35/Rnf213/Ccl5/Dhx58/Stat3/Socs3/Lgals3bp/Sectm1a/Cmpk2/Nampt/Psma3/Hif1a/Ifi27/Tnfaip2/Rsad2/Arl4a/Nfkbia/Wars/Psma2/Irf4/Pfkp/Gzma/Pnp2/Psme1/Irf9/Epsti1/Gch1/Psme2/Lats2/Gpr18/Ly6e/Csf2rb2/Il2rb/Itgb7/Ciita/Mx2/Socs1/Parp14/Cd86/Sod2/Cdkn1a/Pim1/…	Apoh/App/Ccnd2/Col3a1/Col5a2/Cxcl5/Fgfr1/Fstl1/Itgav/Jag1/Jag2/Kcnj8/Lpl/Lrpap1/Lum/Msx1/Nrp1/Olr1/Pdgfa/Pf4/Pglyrp1/Postn/Prg2/Ptk2/S100a4/Serpina5/Slco2a1/Spp1/Stc1/Thbd/Timp1/Tnfrsf21/Vav2/Vcan/Vegfa/Vtn	0.274611
4	HALLMARK_OXIDATIVE_PHOSPHORYLATION	HALLMARK_OXIDATIVE_PHOSPHORYLATION	HALLMARK_OXIDATIVE_PHOSPHORYLATION	194	-0.547464	-2.31881	0.00196078	0.0115741	0.00730994	4870	tags=66%, list=27%, signal=49%	78920/66694/17448/18597/68263/114143/64655/30059/20463/11931/67994/68194/67003/15926/22333/235339/66525/78830/17713/59040/53375/66925/66416/69833/17991/67126/66144/12861/66576/110826/11946/67460/20916/109754/12857/230075/52538/30055/66142/66419/22272/30057/66594/11949/71679/66223/11957/12856/70316/12867/11974/51798/226646/16832/170718/66916/11739/54405/625249/11757/66046/12864/66108/11370/93747/7…	194	Dlst/Uqcrfs1/Mdh2/Pdha1/Pdhb/Atp6v0b/Mrps22/Timm10/Cox7a2l/Atp1b1/Mrps11/Ndufb4/Uqcrc2/Idh1/Vdac1/Dlat/Timm50/Slc25a12/Grpel1/Rhot1/Mtx2/Sdhd/Ndufa7/Polr2f/Ndufa2/Atp5e/Atp6v1f/Cox6a1/Uqcrh/Etfb/Atp5a1/Decr1/Sucla2/Cyb5r3/Cox4i1/Ndufb6/Acaa2/Timm13/Cox7b/Mrpl11/Uqcrq/Timm8b/Uqcr11/Atp5c1/Atp5h/Mrpl35/Atp5j/Cox17/Ndufab1/Cox7c/Atp6v0e/Ech1/Ndufs2/Ldhb/Idh3b/Ndufb7/Slc25a4/Ndufa1/Gpx4/Prdx3/Ndufb5/…	129	Atp6v1h/Cox5b/Ndufb3/Mrpl15/Ndufs1/Idh1/Timm17a/Atp1b1/Mgst3/Sdhc/Ndufs2/Fh1/Gpx4/Atp5d/Ndufs7/Atp5b/Cs/Supv3l1/Uqcr11/Timm13/Slc25a3/Ogdh/Vdac1/Rhot1/Cox11/Uqcr10/Mdh1/Uqcrq/Cox10/Acadvl/Slc25a11/Atp5g1/Atp5h/Dlst/Dld/Timm9/Atp6v1d/Aldh6a1/Nqo2/Uqcrfs1/Isca1/Uqcrb/Mtrr/Ndufs6/Sdha/Cox7c/Ndufs4/Mrps30/Nnt/Vdac2/Glud1/Oxa1l/Sucla2/Mtrf1/Pdhb/Atp6v1c1/Cyc1/Polr2f/Tomm22/Aco2/Cox6c/Ndufa6/Cyb5r3/Atp…	Apoh/App/Ccnd2/Col3a1/Col5a2/Cxcl5/Fgfr1/Fstl1/Itgav/Jag1/Jag2/Kcnj8/Lpl/Lrpap1/Lum/Msx1/Nrp1/Olr1/Pdgfa/Pf4/Pglyrp1/Postn/Prg2/Ptk2/S100a4/Serpina5/Slco2a1/Spp1/Stc1/Thbd/Timp1/Tnfrsf21/Vav2/Vcan/Vegfa/Vtn	0.664948
5	HALLMARK_FATTY_ACID_METABOLISM	HALLMARK_FATTY_ACID_METABOLISM	HALLMARK_FATTY_ACID_METABOLISM	148	-0.445027	-1.81911	0.00201613	0.0115741	0.00730994	3544	tags=39%, list=19%, signal=31%	17252/208715/52683/67460/13118/20916/14874/381045/68021/52538/14447/21743/51798/170718/68801/11370/93747/17449/66052/22361/14079/18207/170789/15446/11758/12908/22275/13180/56451/17436/235674/227095/76238/15108/15107/67442/56752/13849/13177/171210/56791/17319/67956/68465/73724/14080/16852/19186/57436/17025/56720/11409/13076/20194/224530/12972/11674	148	Rdh11/Hmgcs1/Ncaph2/Decr1/Cyp4a12b/Sucla2/Gstz1/Ccdc58/Bphl/Acaa2/Gapdhs/Inmt/Ech1/Idh3b/Elovl5/Acadvl/Echs1/Mdh1/Sdhc/Vnn1/Fabp2/Nthl1/Acot8/Hpgd/Prdx6/Crat/Urod/Pcbd1/Suclg1/Me1/Acaa1b/Hibch/Grhpr/Hsd17b10/Hadh/Retsat/Aldh9a1/Ephx1/Eci1/Acot2/Ube2l6/Mif/Kmt5a/Adipor2/Mcee/Fabp1/Lgals1/Psme1/Gabarapl1/Alad/Tdo2/Acads/Cyp1a1/S100a10/Acat3/Cryz/Aldoa	57	Hibch/D2hgdh/Glul/Aldh9a1/Idh1/Acadl/Prdx6/Fmo1/Hsd17b7/Sdhc/Fh1/Ephx1/G0s2/Vnn1/Pcbd1/Reep6/Serinc1/Mif/Eno3/Mdh1/Ltc4s/Slc22a5/Aldh3a2/Acadvl/Acox1/Fasn/Odc1/Acot2/Acot3/Dlst/Gstz1/Dld/Rdh11/Hsp90aa1/Idi1/Bphl/Hmgcs1/Eci2/Auh/Sdha/Ptprg/Apex1/Psme1/Sucla2/Pdhb/Lgals1/Adsl/Aco2/Ppara/Ncaph2/Gpd1/Ccdc58/Cpox/Cbr1/Cbr3/Ehhadh/Eci1/Nthl1/Acat3/Hsd17b4/Cidea/Acaa2/Cpt1a/Aldh1a1/Acsl5/Gpd2/Ube2l6/Blv…	Apoh/App/Ccnd2/Col3a1/Col5a2/Cxcl5/Fgfr1/Fstl1/Itgav/Jag1/Jag2/Kcnj8/Lpl/Lrpap1/Lum/Msx1/Nrp1/Olr1/Pdgfa/Pf4/Pglyrp1/Postn/Prg2/Ptk2/S100a4/Serpina5/Slco2a1/Spp1/Stc1/Thbd/Timp1/Tnfrsf21/Vav2/Vcan/Vegfa/Vtn	0.385135
6	HALLMARK_ALLOGRAFT_REJECTION	HALLMARK_ALLOGRAFT_REJECTION	HALLMARK_ALLOGRAFT_REJECTION	182	0.416985	1.77446	0.0020284	0.0115741	0.00730994	2374	tags=28%, list=13%, signal=25%	16149/11651/12703/12501/50931/55985/104458/21803/226414/20304/26409/16184/21857/14191/21897/14960/16174/20299/16161/19264/17395/192656/15978/15894/14744/14998/20375/23880/16428/50723/24088/20296/21838/16414/15980/20303/24015/15979/76784/15000/12772/14469/22375/16193/12263/12487/16408/192176/84544/21926/16364	182	Cd74/Akt1/Socs1/Cd3e/Il27ra/Cxcl13/Rars/Tgfb1/Dars/Ccl5/Map3k7/Il2ra/Timp1/Fgr/Tlr1/H2-Aa/Il18rap/Ccl22/Il12rb1/Ptprc/Mmp9/Ripk2/Ifng/Icam1/Gpr65/H2-DMa/Spi1/Fyb/Itk/Icosl/Tlr2/Ccl2/Thy1/Itgb2/Ifngr2/Ccl4/Abce1/Ifngr1/Mtif2/H2-DMb2/Ccr2/Gbp2/Wars/Il6/C2/Cd28/Itgal/Flna/Cd96/Tnf/Irf4	51	Zap70/Il18rap/Cd28/Il10/Cd247/St8sia4/Inhbb/Dars/Dyrk3/Ptprc/Fasl/Fcgr2b/Degs1/Tgfb2/Ifngr1/Prf1/Itgb2/Icosl/Ube2n/Ifng/Srgn/Ube2d1/Lif/Egfr/Mtif2/Lcp2/Il12b/Nlrp3/Ccl2/Ccl7/Ccl12/Ccl4/Npm1/Rars/Itk/Il4/Eif5a/Ccl5/Brca1/Cd7/Hif1a/Gpr65/Hdac9/Wars/Akt1/Inhba/Irf4/Ly86/F2r/Gzma/Stab1/Gzmb/Fyb/Ncf4/Eif3d/Il2rb/Hcls1/Cd80/Cd47/Ifngr2/Socs1/Cd86/Cd96/Rpl3l/Tapbp/H2-Oa/H2-DMa/H2-DMb2/Tap1/Tap2/H2-Ob/Lt…	Apoh/App/Ccnd2/Col3a1/Col5a2/Cxcl5/Fgfr1/Fstl1/Itgav/Jag1/Jag2/Kcnj8/Lpl/Lrpap1/Lum/Msx1/Nrp1/Olr1/Pdgfa/Pf4/Pglyrp1/Postn/Prg2/Ptk2/S100a4/Serpina5/Slco2a1/Spp1/Stc1/Thbd/Timp1/Tnfrsf21/Vav2/Vcan/Vegfa/Vtn	0.28022
7	HALLMARK_INTERFERON_ALPHA_RESPONSE	HALLMARK_INTERFERON_ALPHA_RESPONSE	HALLMARK_INTERFERON_ALPHA_RESPONSE	92	-0.686725	-2.64222	0.00206186	0.0115741	0.00730994	1571	tags=43%, list=9%, signal=40%	70110/109032/14964/56791/21354/64685/71586/243771/19186/69550/15007/19039/17069/66355/16912/231712/80285/108670/100038882/66988/15040/15958/15013/12010/231655/17858/15018/16391/22169/52668/24110/55932/209086/66141/234311/54123/80861/15959/99899/58185	92	Ifi35/Sp110/H2-D1/Ube2l6/Tap1/Nmi/Ifih1/Parp12/Psme1/Bst2/H2-Q10/Lgals3bp/Ly6e/Gmpr/Psmb9/Trafd1/Parp9/Epsti1/Isg15/Lap3/H2-T23/Ifit2/H2-Q2/B2m/Oasl1/Mx2/H2-Q7/Irf9/Cmpk2/Ifi27/Usp18/Gbp3/Samd9l/Ifitm3/Ddx60/Irf7/Dhx58/Ifit3/Ifi44/Rsad2	40	Casp8/Sell/Sp110/Stat2/Ncoa7/Pnpt1/Irf1/Trim25/Cnp/Ifi35/Dhx58/Lgals3bp/Cmpk2/Psma3/Ifi27/Rsad2/Wars/Gmpr/Psme1/Irf9/Lpar6/Epsti1/Elf1/Psme2/Ly6e/Parp9/Cd47/Mx2/Parp14/Cmtr1/Tap1/Psmb8/H2-D1/H2-Q2/H2-Q7/H2-Q10/Trim26/H2-M3/Psmb9/H2-T23/Eif2ak2/Cd74/Batf2/Ifit2/Ifit3/Slc25a28/Ube2l6/B2m/Procr/Ogfr/Nmi/Ifih1/Helz2/Adar/Txnip/Gbp3/Gbp2/Il7/Mov10/Csf1/Ifi44/Tdrd7/Ripk2/Trim14/Isg15/Nub1/Lap3/Oasl1/Cx…	Apoh/App/Ccnd2/Col3a1/Col5a2/Cxcl5/Fgfr1/Fstl1/Itgav/Jag1/Jag2/Kcnj8/Lpl/Lrpap1/Lum/Msx1/Nrp1/Olr1/Pdgfa/Pf4/Pglyrp1/Postn/Prg2/Ptk2/S100a4/Serpina5/Slco2a1/Spp1/Stc1/Thbd/Timp1/Tnfrsf21/Vav2/Vcan/Vegfa/Vtn	0.434783
8	HALLMARK_BILE_ACID_METABOLISM	HALLMARK_BILE_ACID_METABOLISM	HALLMARK_BILE_ACID_METABOLISM	109	-0.451647	-1.77978	0.00208333	0.0115741	0.00730994	2784	tags=28%, list=15%, signal=24%	18642/170442/20655/56362/16922/20183/13124/74114/15494/237320/17117/14149/14711/67442/56752/111175/66307/54683/19301/18171/19659/15496/76263/11611/23957/11806/18633/28250/212503/101502/22139	109	Pfkm/Bbox1/Sod1/Sult1b1/Phyh/Rxrg/Cyp8b1/Crot/Hsd3b3/Aldh8a1/Amacr/Fdxr/Gnmt/Retsat/Aldh9a1/Pecr/Isoc1/Prdx5/Pxmp2/Nr1i2/Rbp1/Hsd3b5/Gstk1/Agxt/Nr0b2/Apoa1/Pex16/Slco1a4/Paox/Hsd3b7/Ttr	31	Efhc1/Cyp27a1/Agxt/Aldh9a1/Rxrg/Pex19/Idh1/Pecr/Aldh8a1/Pex7/Nr1h4/Hsd17b6/Pex13/Pipox/Pex12/Abca8b/Abca9/Abca6/Abca5/Fdxr/Pnpla8/Cyp46a1/Serpina6/Idi1/Bmp6/Atxn1/Hacl1/Ephx2/Amacr/Pfkm/Soat2/Abcd2/Sod1/Nr1i2/Abca3/Cyp39a1/Slc35b2/Pex6/Abcg8/Slc29a1/Gnmt/Nudt12/Ttr/Hsd17b4/Isoc1/Npc1/Slc23a1/Fads1/Aldh1a1/Acsl5/Prdx5/Fads2/Ch25h/Phyh/Abca2/Rxra/Pex16/Slc27a2/Optn/Cat/Bbox1/Slc23a2/Hao1/Abca4/Gclm…	Apoh/App/Ccnd2/Col3a1/Col5a2/Cxcl5/Fgfr1/Fstl1/Itgav/Jag1/Jag2/Kcnj8/Lpl/Lrpap1/Lum/Msx1/Nrp1/Olr1/Pdgfa/Pf4/Pglyrp1/Postn/Prg2/Ptk2/S100a4/Serpina5/Slco2a1/Spp1/Stc1/Thbd/Timp1/Tnfrsf21/Vav2/Vcan/Vegfa/Vtn	0.284404
9	HALLMARK_KRAS_SIGNALING_DN	HALLMARK_KRAS_SIGNALING_DN	HALLMARK_KRAS_SIGNALING_DN	109	-0.451148	-1.77782	0.00208333	0.0115741	0.00730994	1548	tags=11%, list=8%, signal=10%	232078/56358/68916/16008/17687/243085/232370/54634/67426/17858/11944/58185	109	Thnsl2/Copz2/Cdkal1/Igfbp2/Msh5/Ugt2b35/Clstn3/Magix/Coq8a/Mx2/Atp4a/Rsad2	12	Igfbp2/Efhd1/Serpinb2/Klhdc8a/Mfsd6/Bard1/Pdcd1/Btg2/Pkp1/Coq8a/Tgfb2/Sgk1/Ifng/Edar/Slc29a3/Gamt/Slc16a7/Kcnmb1/Il12b/Gp1ba/Copz2/Gprc5c/Pdk2/Dtnb/Zc2hc1c/Rsad2/Ngb/Serpina10/Edn1/Cdkal1/Thrb/Itih3/Tgm1/Selenop/Tg/Kmt2d/Krt4/Snn/Ypel1/P2rx6/Cd80/Mx2/Mefv/Vpreb1/Prodh/Sidt1/Cldn8/Cyp39a1/Tff2/Msh5/Slc25a23/Synpo/Sptbn2/Entpd7/Cpeb3/Camk1d/Gtf3c5/Hc/Nr6a1/Nr4a2/Abcb11/Ptprj/Skil/Celsr2/Egf/Ptgfr/F…	Apoh/App/Ccnd2/Col3a1/Col5a2/Cxcl5/Fgfr1/Fstl1/Itgav/Jag1/Jag2/Kcnj8/Lpl/Lrpap1/Lum/Msx1/Nrp1/Olr1/Pdgfa/Pf4/Pglyrp1/Postn/Prg2/Ptk2/S100a4/Serpina5/Slco2a1/Spp1/Stc1/Thbd/Timp1/Tnfrsf21/Vav2/Vcan/Vegfa/Vtn	0.110092
10	HALLMARK_ADIPOGENESIS	HALLMARK_ADIPOGENESIS	HALLMARK_ADIPOGENESIS	191	-0.400152	-1.69594	0.00389864	0.0170068	0.0107411	4346	tags=39%, list=24%, signal=30%	14732/18618/15926/66148/235339/29864/17713/13850/12861/56298/110826/19376/16956/13830/13350/67460/52538/66142/104112/22272/66594/13358/70316/51798/13202/66916/625249/13476/11757/93747/66052/67171/66152/20655/56428/16922/28080/12476/102247/11861/12053/12908/66445/103172/12868/57875/56451/17436/11816/227095/68202/216820/15107/12974/67442/68653/69574/77037/68465/12452/67680/68349/223775/14778/22340/…	191	Gpam/Pemt/Idh1/Dnajc15/Dlat/Rnf11/Grpel1/Ephx2/Cox6a1/Atl2/Etfb/Rab34/Lpl/Stom/Dgat1/Decr1/Acaa2/Cox7b/Acly/Uqcrq/Uqcr11/Slc25a1/Ndufab1/Ech1/Ddt/Ndufb7/Gpx4/Reep5/Prdx3/Echs1/Sdhc/Dram2/Uqcr10/Sod1/Mtch2/Phyh/Atp5o/Cd151/Gpat4/Arl4a/Bcl6/Crat/Cyc1/Chchd10/Cox8a/Angptl4/Suclg1/Me1/Apoe/Hibch/Ndufa5/Dhrs7b/Hadh/Cs/Retsat/Samm50/Cmbl/Mrap/Adipor2/Ccng2/Sdhb/Ndufs3/Pim3/Gpx3/Vegfb/Marc2/Cyp4b1/Qdpr/…	75	Hibch/Ppp1r15b/Mrpl15/Nabp1/Idh1/Acadl/Mgst3/Sdhc/Marc2/Ifngr1/Lama4/Sowahc/Chchd10/Slc19a1/Gpx4/Reep6/Baz2a/Cs/Itga7/Ddt/Pfkl/Agpat3/Uqcr11/Esyt1/Gpx3/Dhrs7b/Rab34/Tob1/Stat5a/Nmt1/Slc25a10/Uqcr10/Ltc4s/Uqcrq/Pemt/Acly/Acox1/Gphn/Pqlc3/Dld/Arl4a/Dnajb9/Dhrs7/Rreb1/Omd/Ubqln1/Nkiras1/Sncg/Ghitm/Ephx2/Dnajc15/Lifr/Cmbl/Cyc1/Aco2/Samm50/Pim3/Angpt1/Enpp2/Dgat1/Tst/Adcy6/Adipoq/Mylk/Gbe1/Sod1/Mrap/I…	Apoh/App/Ccnd2/Col3a1/Col5a2/Cxcl5/Fgfr1/Fstl1/Itgav/Jag1/Jag2/Kcnj8/Lpl/Lrpap1/Lum/Msx1/Nrp1/Olr1/Pdgfa/Pf4/Pglyrp1/Postn/Prg2/Ptk2/S100a4/Serpina5/Slco2a1/Spp1/Stc1/Thbd/Timp1/Tnfrsf21/Vav2/Vcan/Vegfa/Vtn	0.39267
11	HALLMARK_XENOBIOTIC_METABOLISM	HALLMARK_XENOBIOTIC_METABOLISM	HALLMARK_XENOBIOTIC_METABOLISM	195	-0.369681	-1.56604	0.00392927	0.0170068	0.0107411	3228	tags=27%, list=18%, signal=22%	14872/103149/22271/55942/19662/51798/13202/67880/68801/83702/53328/11846/116852/109900/22361/74114/15452/14377/67489/209027/14711/11816/16006/12368/67442/56752/29858/13849/59046/233016/66082/12846/269378/20733/14080/20517/57436/14859/246277/13195/67103/27273/55927/72082/56720/12583/14865/13076/104158/15486/70789/14629	195	Gstt2/Upb1/Upp1/Sertad1/Rbp4/Ech1/Ddt/Dcxr/Elovl5/Akr1c6/Pgrmc1/Arg1/Akr1c20/Asl/Vnn1/Crot/Hprt/G6pc/Ap4b1/Pycr1/Gnmt/Apoe/Igfbp1/Casp6/Retsat/Aldh9a1/Pmm1/Ephx1/Arpp19/Blvrb/Abhd6/Comt/Ahcy/Spint2/Fabp1/Slc22a1/Gabarapl1/Gsta3/Csad/Ddc/Ptgr1/Pdk4/Hes6/Cyp2c55/Tdo2/Cdo1/Gstm4/Cyp1a1/Ces1d/Hsd17b2/Kynu/Gclc	52	Gsta3/Il1r1/Aox1/Cyp27a1/Aldh9a1/Crp/Idh1/Hes6/Fmo1/Fmo3/Ephx1/Tgfb2/Hsd11b1/Esr1/Vnn1/Upb1/Igf1/Ptges3/Arg1/Man1a/Ddt/Gstt2/Shmt2/Igfbp1/Upp1/Sar1b/Vtn/Slc35b1/Igfbp4/G6pc/Nmt1/Ddc/Cyfip2/Leap2/Pemt/Tmem97/Abcc3/Jup/Mpp2/Acox1/Pycr1/Dcxr/Mthfd1/Arg2/Id2/Acp1/Dhrs7/Entpd5/Serpina6/Akr1c6/Akr1c21/Bphl/Gcnt2/Ninj1/Akr1c20/Fbp1/Mccc2/Abhd6/Itih4/Acox2/Itih1/Hacl1/Gch1/Ndrg2/Dhrs1/Aco2/Fbln1/Tmbim6/M…	Apoh/App/Ccnd2/Col3a1/Col5a2/Cxcl5/Fgfr1/Fstl1/Itgav/Jag1/Jag2/Kcnj8/Lpl/Lrpap1/Lum/Msx1/Nrp1/Olr1/Pdgfa/Pf4/Pglyrp1/Postn/Prg2/Ptk2/S100a4/Serpina5/Slco2a1/Spp1/Stc1/Thbd/Timp1/Tnfrsf21/Vav2/Vcan/Vegfa/Vtn	0.266667
12	HALLMARK_INFLAMMATORY_RESPONSE	HALLMARK_INFLAMMATORY_RESPONSE	HALLMARK_INFLAMMATORY_RESPONSE	175	0.389587	1.64164	0.00408163	0.0170068	0.0107411	2380	tags=25%, list=13%, signal=22%	269346/14723/12986/17167/20304/21857/21897/56066/14726/16174/18787/54216/19217/20299/14066/20529/14734/13058/192656/23845/15894/15945/16177/11987/18414/50723/14293/24088/13732/18174/15980/17869/20354/14747/19219/16193/22035/27218/16362/15975/19222/20312/14679/19419	175	Slc28a2/Gp1ba/Csf3r/Marco/Ccl5/Timp1/Tlr1/Cxcl11/Pdpn/Il18rap/Serpine1/Pcdh7/Ptger2/Ccl22/F3/Slc31a1/Gpc3/Cybb/Ripk2/Clec5a/Icam1/Cxcl10/Il1r1/Slc7a1/Osmr/Icosl/Fpr1/Tlr2/Emp3/Slc11a2/Ifngr2/Myc/Sema4d/Cmklr1/Ptger4/Il6/Tnfsf10/Slamf1/Irf1/Ifnar1/Ptgir/Cx3cl1/Gnai3/Rasgrp1	44	Il1r1/Il18r1/Il18rap/Il10/Rgs16/Sele/Sell/Cd48/Slamf1/Fzd5/Marco/Cd55/Btg2/Rgs1/Icosl/Atp2b1/Gna15/Osm/Lif/Lcp2/Il12b/Irf1/Nlrp3/Adora2b/Pik3r5/Gp1ba/Scarf1/Ccl7/Ccl12/Itgb3/Kcnj2/Sphk1/Ccl5/Ccr7/Nampt/Hif1a/Psen1/Ahr/Nfkbia/Gpr132/Itgb8/Klf6/Inhba/Edn1/Rnf144b/Sema4d/Ptger2/Mmp14/Stab1/Gch1/Gpr183/Myc/Ly6e/Acvr1b/Ptger4/Osmr/Il7r/Il2rb/Slc11a2/Itga5/Dcbld2/Ifnar1/Ifngr2/Mefv/Cdkn1a/Tapbp/Gabbr1/…	Apoh/App/Ccnd2/Col3a1/Col5a2/Cxcl5/Fgfr1/Fstl1/Itgav/Jag1/Jag2/Kcnj8/Lpl/Lrpap1/Lum/Msx1/Nrp1/Olr1/Pdgfa/Pf4/Pglyrp1/Postn/Prg2/Ptk2/S100a4/Serpina5/Slco2a1/Spp1/Stc1/Thbd/Timp1/Tnfrsf21/Vav2/Vcan/Vegfa/Vtn	0.251429
13	HALLMARK_E2F_TARGETS	HALLMARK_E2F_TARGETS	HALLMARK_E2F_TARGETS	187	0.329704	1.41101	0.00603622	0.0218214	0.0137819	3266	tags=25%, list=18%, signal=20%	68479/51797/58184/60364/19891/106795/78833/22042/15574/68219/27354/70099/26951/71777/50927/12530/19362/16647/15270/18949/110809/52592/22256/67967/19355/53892/17869/21917/22059/67134/12236/20937/70769/18817/17217/14852/67684/103573/12190/17768/20382/18393/11637/17089/12580/20877	187	Phf5a/Ctps/Cnot9/Donson/Rpa2/Tcf19/Gins3/Tfrc/Hus1/Nudt21/Nbn/Smc4/Zw10/Ing3/Nasp/Cdc25a/Rad51ap1/Kpna2/H2afx/Pnn/Srsf1/Brms1l/Ung/Pold3/Rad1/Ppm1d/Myc/Tmpo/Trp53/Nop56/Bub1b/Suv39h1/Nolc1/Plk1/Mcm4/Gspt1/Luc7l3/Xpo1/Brca2/Mthfd2/Srsf2/Orc2/Ak2/Lyar/Cdkn2c/Aurkb	46	Cnot9/Ube2t/Mcm3/Prim2/Orc2/Bard1/Mcm6/Lbr/Asf1a/Nap1l1/Cdk4/Timeless/Pan2/Cdk1/Tmpo/Nup107/Xpo1/Aurkb/Naa38/Trp53/Spag5/Ppm1d/Srsf1/Tubg1/Birc5/Pold2/Tbrg4/Hus1/Hmmr/Pttg1/Rad50/Shmt1/Rad51c/Luc7l3/Top2a/Psmc3ip/Brca1/Kpna2/Srsf2/Tk1/Smc6/Rrm2/Brms1l/Pnn/Eif2s1/Ubr7/Cks2/Nup153/Dek/Mxd3/Trip13/Cdkn3/Dlgap5/Diaph3/Rad1/Myc/Xrcc6/Espl1/Rad21/Atad2/Phf5a/Cenpm/Racgap1/Cbx5/Prkdc/Tfrc/Gspt1/Mcm4/Ran…	Apoh/App/Ccnd2/Col3a1/Col5a2/Cxcl5/Fgfr1/Fstl1/Itgav/Jag1/Jag2/Kcnj8/Lpl/Lrpap1/Lum/Msx1/Nrp1/Olr1/Pdgfa/Pf4/Pglyrp1/Postn/Prg2/Ptk2/S100a4/Serpina5/Slco2a1/Spp1/Stc1/Thbd/Timp1/Tnfrsf21/Vav2/Vcan/Vegfa/Vtn	0.245989
14	HALLMARK_G2M_CHECKPOINT	HALLMARK_G2M_CHECKPOINT	HALLMARK_G2M_CHECKPOINT	183	0.335491	1.42781	0.00610998	0.0218214	0.0137819	4478	tags=37%, list=24%, signal=28%	26965/19891/245474/105727/21803/15574/23834/21781/70099/50927/16319/12237/12530/16647/15270/110809/11987/19290/104394/12443/12545/268996/226525/27374/17869/13405/21917/16882/19650/20937/70769/18817/19134/71819/17765/26885/20539/14852/20460/103573/26909/12190/13645/18141/20382/12580/20877/75717/17219/105988/99375/18286/73804/98386/26416/12412/71514/20842/16573/21969/76464/20496/13640/68612/16551/1…	183	Cul1/Rpa2/Dkc1/Slc38a1/Tgfb1/Hus1/Cdc6/Tfdp1/Smc4/Nasp/Incenp/Bub3/Cdc25a/Kpna2/H2afx/Srsf1/Slc7a1/Pura/E2f4/Ccnd1/Cdc7/Ss18/Rasal2/Prmt5/Myc/Dmd/Tmpo/Lig3/Rbl1/Suv39h1/Nolc1/Plk1/Prpf4b/Kif23/Mtf2/Casp8ap2/Slc7a5/Gspt1/Stil/Xpo1/Exo1/Brca2/Egf/Nup50/Srsf2/Cdkn2c/Aurkb/Cul5/Mcm6/Espl1/Cul4a/Odf2/Kif2c/Lbr/Mapk14/Cbx1/Sfpq/Stag1/Kif5b/Top1/Knl1/Slc12a2/Efna5/Ube2c/Kif11/Cenpf/G3bp1/Uck2	68	Exo1/Nek2/Mcm3/Prim2/Bard1/Cul3/Ncl/Dtymk/Mcm6/Rasal2/Uck2/Hnrnpu/Lbr/Cenpf/Katna1/Cdk4/Fbxo5/Marcks/Amd1/Cdk1/Tmpo/Xpo1/G3bp1/Aurkb/Lig3/Srsf1/Cbx1/Cdc6/Birc5/Ewsr1/H2afv/Hus1/Hmmr/Pttg1/Pafah1b1/Kpnb1/Top2a/Cdc27/Kpna2/Srsf2/Odc1/Arid4a/Mnat1/Hif1a/Foxn3/Rps6ka5/Prpf4b/Cks2/E2f3/Fancc/Cdkn3/Pbk/Prmt5/Sqle/Myc/Nup50/Troap/Espl1/Rad21/Slc38a1/Ccnt1/Racgap1/Polq/Gspt1/Cdc45/Tra2b/Hmga1/Mapk14/Chaf…	Apoh/App/Ccnd2/Col3a1/Col5a2/Cxcl5/Fgfr1/Fstl1/Itgav/Jag1/Jag2/Kcnj8/Lpl/Lrpap1/Lum/Msx1/Nrp1/Olr1/Pdgfa/Pf4/Pglyrp1/Postn/Prg2/Ptk2/S100a4/Serpina5/Slco2a1/Spp1/Stc1/Thbd/Timp1/Tnfrsf21/Vav2/Vcan/Vegfa/Vtn	0.371585
15	HALLMARK_UNFOLDED_PROTEIN_RESPONSE	HALLMARK_UNFOLDED_PROTEIN_RESPONSE	HALLMARK_UNFOLDED_PROTEIN_RESPONSE	110	0.399067	1.58193	0.00766284	0.0255428	0.0161323	3212	tags=35%, list=18%, signal=29%	50907/245474/73192/100037258/72599/228998/15270/27053/50527/77591/67398/56494/14828/74108/12611/231452/22433/13666/20416/192193/27362/18044/12282/67134/107513/70769/18045/66482/50912/107272/227715/72068/52808/20539/69048/218343/17768/76687/226641	110	Preb/Dkc1/Xpot/Dnajc3/Pdia5/Arfgap1/H2afx/Asns/Ero1l/Ddx10/Srpr/Gosr2/Hspa5/Parn/Cebpg/Sdad1/Xbp1/Eif2ak3/Shc1/Edem1/Dnajb9/Nfya/Hyou1/Nop56/Ssr1/Nolc1/Nfyb/Exoc2/Exosc10/Psat1/Exosc2/Cnot2/Tspyl2/Slc7a5/Slc30a5/Ttc37/Mthfd2/Spcs3/Atf6	39	Nabp1/Atf6/Atf3/Eef2/Ddit4/Nfyb/Cnot2/Xpot/Xbp1/Igfbp1/Nhp2/Ccl12/Slc1a4/Stc2/Npm1/Cnot6/Eif4a1/Gemin4/Gosr2/Ern1/Wipi1/Eif4a3/Pdia6/Eif2s1/Dnajb9/Iars/Ttc37/Paip1/Exoc2/Tubb2a/Ssr1/Slc30a5/Dcp1a/Dnajc3/Spcs1/Ero1l/Exosc4/Kdelr3/Atf4/Tars/Ywhaz/Eif4g1/Eif4a2/Parn/Pdia5/Vegfa/Nfya/Khsrp/Dcp2/Rps14/Cxxc1/Kif5b/Hspa9/Yif1a/Nolc1/Banf1/Psat1/Ifit1bl1/Aldh18a1/Exosc1/Exosc2/Hspa5/Chac1/Nop56/Cebpb/Arf…	Apoh/App/Ccnd2/Col3a1/Col5a2/Cxcl5/Fgfr1/Fstl1/Itgav/Jag1/Jag2/Kcnj8/Lpl/Lrpap1/Lum/Msx1/Nrp1/Olr1/Pdgfa/Pf4/Pglyrp1/Postn/Prg2/Ptk2/S100a4/Serpina5/Slco2a1/Spp1/Stc1/Thbd/Timp1/Tnfrsf21/Vav2/Vcan/Vegfa/Vtn	0.354545
16	HALLMARK_CHOLESTEROL_HOMEOSTASIS	HALLMARK_CHOLESTEROL_HOMEOSTASIS	HALLMARK_CHOLESTEROL_HOMEOSTASIS	71	-0.470819	-1.72154	0.00838574	0.0262055	0.0165508	4514	tags=42%, list=25%, signal=32%	18793/11910/108767/110196/13595/11747/16956/208715/51798/104174/60525/235293/54140/26876/192156/11676/69590/110006/17855/60599/228775/18030/69787/68312/66071/50762/68603/224530/12660/16592	71	Plaur/Atf3/Pnrc1/Fdps/Ebp/Anxa5/Lpl/Hmgcs1/Ech1/Gldc/Acss2/Sc5d/Avpr1a/Adh4/Mvd/Aldoc/Gpx8/Gusb/Mvk/Trp53inp1/Trib3/Nfil3/Anxa13/Gstm7/Ethe1/Fbxo6/Pmvk/Acat3/Chka/Fabp5	30	Fam129a/Hsd17b7/Atf3/Lss/Avpr1a/Aldoc/Cxcl16/Tmem97/Actg1/Pcyt2/Fasn/Lgmn/Idi1/Hmgcs1/Nfil3/Hmgcr/Gpx8/Lgals3/Clu/Fdft1/Mal2/Sqle/Srebf2/Anxa13/Alcam/Acat3/Tnfrsf12a/Cbs/Stard4/Chka/Stx5a/Fads2/Gldc/Abca2/Acss2/Jag1/Trib3/Fabp5/Pmvk/S100a11/Adh4/Anxa5/Fdps/Gstm7/Trp53inp1/Errfi1/Pnrc1/Fbxo6/Cpeb2/Mvk/Atxn2/Cyp51/Gnai1/Antxr2/Gusb/Pparg/Cd9/Plaur/Ethe1/Ech1/Dhcr7/Atf5/Lpl/Mvd/Ldlr/Plscr1/Ctnnb1/Sc…	Apoh/App/Ccnd2/Col3a1/Col5a2/Cxcl5/Fgfr1/Fstl1/Itgav/Jag1/Jag2/Kcnj8/Lpl/Lrpap1/Lum/Msx1/Nrp1/Olr1/Pdgfa/Pf4/Pglyrp1/Postn/Prg2/Ptk2/S100a4/Serpina5/Slco2a1/Spp1/Stc1/Thbd/Timp1/Tnfrsf21/Vav2/Vcan/Vegfa/Vtn	0.422535
17	HALLMARK_HYPOXIA	HALLMARK_HYPOXIA	HALLMARK_HYPOXIA	179	-0.33175	-1.39174	0.0291829	0.085832	0.0542097	3442	tags=31%, list=19%, signal=25%	70186/12577/16476/12306/15529/54371/13358/13008/14447/20341/17872/78889/56174/68507/16572/23849/11676/93692/19309/57875/16006/76238/53412/12575/12368/18655/14635/99929/19017/17319/21991/18030/231507/15211/12452/54683/105785/228026/17133/104263/18451/74747/11535/21809/16009/52331/22022/17988/20971/14281/12226/18484/56277/11674/19252	179	Fam162a/Cdkn1c/Jun/Anxa2/Sdc2/Chst2/Slc25a1/Csrp2/Gapdhs/Selenbp1/Ppp1r15a/Wsb1/Nagk/Ppfia4/Kif5a/Klf6/Aldoc/Glrx/Pygm/Angptl4/Igfbp1/Grhpr/Ppp1r3c/Cdkn1a/Casp6/Pgk1/Galk1/Tiparp/Ppargc1a/Mif/Tpi1/Nfil3/Plac8/Hexa/Ccng2/Prdx5/Kdelr3/Pdk1/Maff/Kdm3a/P4ha1/Ddit4/Adm/Tgfb3/Igfbp3/Stbd1/Tpst2/Ndrg1/Sdc4/Fos/Btg1/Pam/Tmem45a/Aldoa/Dusp1	55	Ankzf1/Ackr3/Gpc1/Klf7/Hdlbp/Pam/Bcl2/Cxcr4/Ppfia4/Pkp1/Atf3/Akap12/Cited2/P4ha1/Ilvbl/Btg1/Dcn/Csrp2/Ddit3/Tnfaip3/Foxo3/Ddit4/Chst3/Hk1/Mif/Pfkl/Kif5a/Igfbp1/Egfr/P4ha2/Adora2b/Eno3/Aldoc/Gaa/Pgam2/Gck/Igfbp3/Ugp2/Stc2/Wsb1/Prkca/Galk1/Jmjd6/Fos/Pgf/Tgfb3/Klf6/Gcnt2/Tgfbi/Glrx/Pfkp/Nfil3/Fbp1/Map3k1/Stc1/Ndst2/Ero1l/Bnip3l/Sdc2/Maff/Kdelr3/Ext1/Ndrg1/Myh9/Pdgfb/Klhl24/Gbe1/Slc25a1/Fam162a/Tmem4…	Apoh/App/Ccnd2/Col3a1/Col5a2/Cxcl5/Fgfr1/Fstl1/Itgav/Jag1/Jag2/Kcnj8/Lpl/Lrpap1/Lum/Msx1/Nrp1/Olr1/Pdgfa/Pf4/Pglyrp1/Postn/Prg2/Ptk2/S100a4/Serpina5/Slco2a1/Spp1/Stc1/Thbd/Timp1/Tnfrsf21/Vav2/Vcan/Vegfa/Vtn	0.307263
18	HALLMARK_REACTIVE_OXYGEN_SPECIES_PATHWAY	HALLMARK_REACTIVE_OXYGEN_SPECIES_PATHWAY	HALLMARK_REACTIVE_OXYGEN_SPECIES_PATHWAY	48	-0.445433	-1.52738	0.0389344	0.105474	0.0666152	4338	tags=52%, list=24%, signal=40%	68194/14782/16477/14381/53381/320495/68576/56615/21672/226646/625249/110265/22166/20655/12581/11927/11758/14325/93692/110854/15369/14778/76650/67130/14629	48	Ndufb4/Gsr/Junb/G6pdx/Prdx4/Ipcef1/Lamtor5/Mgst1/Prdx2/Ndufs2/Gpx4/Msra/Txn1/Sod1/Cdkn2d/Atox1/Prdx6/Ftl1/Glrx/Ptpa/Hmox2/Gpx3/Srxn1/Ndufa6/Gclc	25	Glrx2/Stk25/Prdx6/Ndufs2/Gpx4/Txnrd1/Ipcef1/Sbno2/Gpx3/Mpo/Atox1/Glrx/Pfkp/Msra/Ndufa6/Hmox2/Abcc1/Txnrd2/Sod1/Ndufb4/Scaf4/Sod2/Mbp/Hhex/Pdlim1/Ptpa/Srxn1/Cat/Lamtor5/Gclm/Prdx1/Txn1/Mgst1/Ercc2/Selenos/Lsp1/Egln2/Ftl1/Fes/Gsr/Prdx2/Junb/Nqo1/Gclc/Cdkn2d/Oxsr1/G6pdx/Prdx4	Apoh/App/Ccnd2/Col3a1/Col5a2/Cxcl5/Fgfr1/Fstl1/Itgav/Jag1/Jag2/Kcnj8/Lpl/Lrpap1/Lum/Msx1/Nrp1/Olr1/Pdgfa/Pf4/Pglyrp1/Postn/Prg2/Ptk2/S100a4/Serpina5/Slco2a1/Spp1/Stc1/Thbd/Timp1/Tnfrsf21/Vav2/Vcan/Vegfa/Vtn	0.520833
19	HALLMARK_MYOGENESIS	HALLMARK_MYOGENESIS	HALLMARK_MYOGENESIS	147	-0.326413	-1.33694	0.0400802	0.105474	0.0666152	5106	tags=36%, list=28%, signal=26%	11603/216459/225115/16651/15200/80888/16419/22354/14681/21955/12391/20893/110196/13019/16795/13009/11443/13644/16582/93739/17880/17929/12865/17907/18642/14613/12017/14226/68507/14199/22004/12908/21345/19309/53412/12575/17896/20698/76954/13682/21924/17868/11489/77090/14778/17873/16009/227753/19165/29817/11790/56188/20692	147	Agrn/Myl6b/Svil/Sspn/Hbegf/Hspb8/Itgb5/Vipr1/Gnao1/Tnnt1/Cav3/Bhlhe40/Fdps/Ctf1/Large1/Csrp3/Chrnb1/Efs/Kifc3/Gabarapl2/Myh11/Myom1/Cox7a1/Mylpf/Pfkm/Gja5/Bag1/Fkbp1b/Ppfia4/Fhl1/Tpm2/Crat/Tagln/Pygm/Ppp1r3c/Cdkn1a/Myl4/Sphk1/St5/Eif4a2/Tnnc1/Mybpc3/Adam12/Ocel1/Gpx3/Gadd45b/Igfbp3/Gsn/Psen2/Igfbp7/Speg/Fxyd1/Sparc	53	Des/Speg/Mybph/Tnnt2/Col6a3/Ppfia4/Psen2/Gadd45b/Igf1/Itga7/Lama2/Tpd52l1/Col6a2/Myl6b/Erbb3/Aebp1/Gpx3/Eno3/Myo1c/Col1a1/Myl4/Itgb4/Sphk1/Gaa/Smtn/Pgam2/Myl7/Camk2b/Igfbp3/Stc2/Sgcd/Sparc/Flii/Chrnb1/Hdac5/Fkbp1b/Lpin1/Ifrd1/Ckb/Mef2c/Actn2/Fst/Tnnc1/Clu/Klf5/Efs/Sorbs3/Rb1/Ptp4a3/Pfkm/Myh9/Mapk12/Plxnb2/Ephb3/Eif4a2/Itgb5/Mylk/Adcy9/Myh11/App/Cdkn1a/Myom1/Tsc2/Cacna1h/Svil/Dtna/Bin1/Hbegf/Pcx/P…	Apoh/App/Ccnd2/Col3a1/Col5a2/Cxcl5/Fgfr1/Fstl1/Itgav/Jag1/Jag2/Kcnj8/Lpl/Lrpap1/Lum/Msx1/Nrp1/Olr1/Pdgfa/Pf4/Pglyrp1/Postn/Prg2/Ptk2/S100a4/Serpina5/Slco2a1/Spp1/Stc1/Thbd/Timp1/Tnfrsf21/Vav2/Vcan/Vegfa/Vtn	0.360544
20	HALLMARK_PEROXISOME	HALLMARK_PEROXISOME	HALLMARK_PEROXISOME	95	-0.359984	-1.38506	0.0469083	0.117271	0.0740658	5196	tags=45%, list=28%, signal=33%	27416/18477/16413/114664/66437/19299/11666/433256/20148/231396/22629/54725/15356/15926/110196/66887/13850/20348/73836/15461/76524/17252/72129/51798/11739/68801/20655/20183/170789/12908/235674/12257/67442/56752/110959/66307/54683/18171/243085/20524/76263/101502/22139	95	Abcc5/Prdx1/Itgb1bp1/Hsd17b11/Fis1/Abcd3/Abcd1/Acsl5/Dhrs3/Ugt2b36/Ywhah/Cadm1/Hmgcl/Idh1/Fdps/Lonp2/Ephx2/Sema3c/Slc35b2/Hras/Cln6/Rdh11/Pex13/Ech1/Slc25a4/Elovl5/Sod1/Rxrg/Acot8/Crat/Acaa1b/Tspo/Retsat/Aldh9a1/Nudt19/Isoc1/Prdx5/Nr1i2/Ugt2b35/Slc25a17/Gstk1/Hsd3b7/Ttr	43	Aldh9a1/Rxrg/Idh1/Vps4b/Dlg4/Pex13/Top2a/Slc25a19/Acox1/Itgb1bp1/Esr2/Rdh11/Serpina6/Idi1/Eci2/Atxn1/Cdk7/Ephx2/Tspo/Pabpc1/Slc25a17/Abcd2/Sod1/Abcc5/Ehhadh/Nr1i2/Sod2/Slc35b2/Pex6/Msh2/Ttr/Ercc3/Hsd17b4/Isoc1/Fads1/Aldh1a1/Acsl5/Prdx5/Ide/Slc27a2/Crat/Cat/Slc23a2/Acot8/Bcl10/Pex2/Fdps/Hao2/Abcd3/Dhcr24/Prdx1/Hmgcl/Dhrs3/Dio1/Scp2/Ctps/Pex14/Abcb1a/Abcb4/Sema3c/Ywhah/Ugt2b35/Fis1/Ctbp1/Ugt2b1/Ugt…	Apoh/App/Ccnd2/Col3a1/Col5a2/Cxcl5/Fgfr1/Fstl1/Itgav/Jag1/Jag2/Kcnj8/Lpl/Lrpap1/Lum/Msx1/Nrp1/Olr1/Pdgfa/Pf4/Pglyrp1/Postn/Prg2/Ptk2/S100a4/Serpina5/Slco2a1/Spp1/Stc1/Thbd/Timp1/Tnfrsf21/Vav2/Vcan/Vegfa/Vtn	0.452632
21	HALLMARK_UV_RESPONSE_UP	HALLMARK_UV_RESPONSE_UP	HALLMARK_UV_RESPONSE_UP	147	-0.316978	-1.2983	0.0541082	0.128829	0.0813657	4227	tags=38%, list=23%, signal=30%	74325/17713/53319/16477/12228/66144/12445/17075/66427/19182/13350/20867/12577/245841/53318/105675/19063/20751/232910/11739/12227/71765/433375/12799/18213/22275/18412/12215/59045/18391/235674/17308/13849/14964/21354/16008/81489/14778/22174/19935/55938/15007/12367/14228/14281/12583/13039/12226/13076/15040/12566/12660/15013/22117/11674/15018	147	Cltb/Grpel1/Nxf1/Junb/Btg3/Atp6v1f/Ccnd3/Epcam/Cyb5b/Psmc3/Dgat1/Stip1/Cdkn1c/Polr2h/Pdlim3/Ppif/Ppt1/Spr/Ap2s1/Slc25a4/Btg2/Klhdc3/Creg1/Cnp/Ntrk3/Urod/Sqstm1/Bsg/Stard3/Sigmar1/Acaa1b/Mgat1/Ephx1/H2-D1/Tap1/Igfbp2/Dnajb1/Gpx3/Tyro3/Mrpl23/Apom/H2-Q10/Casp3/Fkbp4/Fos/Cdo1/Ctsl/Btg1/Cyp1a1/H2-T23/Cdk2/Chka/H2-Q2/Tst/Aldoa/H2-Q7	56	Plcl1/Igfbp2/Cyb5r1/Creg1/Tgfbrap1/Gls/Tuba4a/Stk25/Btg2/Fmo1/Hnrnpu/Ephx1/Atf3/Cdc34/Bsg/Btg1/Amd1/Ddx21/Cdk2/Ykt6/Mgat1/Irf1/Gpx3/Dlg4/Arrb2/Stard3/Cnp/Fgf18/Sqstm1/Polg2/Hspa2/Fos/Eif5/Rhob/Nfkbia/Il6st/Cltb/Ctsl/Ppif/Parp2/Mmp14/Prkcd/Gch1/Atp6v1c1/Grina/Tmbim6/Nr4a1/Tars/Ago2/Dgat1/Tst/Polr2h/Tfrc/Clcn2/Rfc4/Ppp1r2/Hspa13/Btg3/Sod2/Rxrb/Tap1/H2-D1/H2-Q2/H2-Q7/H2-Q10/H2-M3/Ccnd3/Epcam/Bak1/Wi…	Apoh/App/Ccnd2/Col3a1/Col5a2/Cxcl5/Fgfr1/Fstl1/Itgav/Jag1/Jag2/Kcnj8/Lpl/Lrpap1/Lum/Msx1/Nrp1/Olr1/Pdgfa/Pf4/Pglyrp1/Postn/Prg2/Ptk2/S100a4/Serpina5/Slco2a1/Spp1/Stc1/Thbd/Timp1/Tnfrsf21/Vav2/Vcan/Vegfa/Vtn	0.380952
22	HALLMARK_P53_PATHWAY	HALLMARK_P53_PATHWAY	HALLMARK_P53_PATHWAY	184	-0.295817	-1.24285	0.0839844	0.190874	0.120552	4062	tags=34%, list=22%, signal=26%	18590/13663/12362/12445/140742/18081/54217/15461/67941/13830/105501/14694/12569/70186/16476/68428/20042/17347/22271/71665/16832/59002/19734/67880/17872/12227/232440/12028/27280/66383/224624/14149/64058/17112/19367/192231/23853/16175/12575/19143/67442/16970/29858/13849/20698/53619/21354/108100/228775/13033/74747/21807/216456/17988/231712/116914/76500/14667/14281/12226/20194/67426	184	Pdgfa/Ei24/Casp1/Ccnd3/Sesn1/Ninj1/Rpl36/Hras/Rps27l/Stom/Abhd4/Rack1/Cdk5r1/Fam162a/Jun/Steap3/Rps12/Mknk2/Upp1/Fuca1/Ldhb/Wrap73/Rgs16/Dcxr/Ppp1r15a/Btg2/H2afj/Bax/Phlda3/Iscu/Rab40c/Fdxr/Perp/Tm4sf1/Rad9a/Hexim1/Def6/Il1a/Cdkn1a/St14/Retsat/Lrmp/Pmm1/Ephx1/Sphk1/Blcap/Tap1/Baiap2/Trib3/Ctsd/Ddit4/Tsc22d1/Gls2/Ndrg1/Trafd1/Slc19a2/Ip6k2/Gm2a/Fos/Btg1/S100a10/Coq8a	62	Ercc5/Phlda3/Rgs16/Slc19a2/Ptpn14/Inhbb/Steap3/Btg2/Ier5/Coq8a/Ephx1/Atf3/Perp/Sesn1/Btg1/Ddit3/Gls2/Rps12/Tpd52l1/Foxo3/Ddit4/Mknk2/Dram1/Apaf1/Mdm2/Dgka/Lif/Upp1/Rack1/Hint1/Gm2a/Trp53/Tax1bp3/Cdk5r1/Ppm1d/Tob1/Hexim1/Itgb4/Sphk1/Baiap2/Tcn2/Ccng1/Cyfip2/Alox8/Traf4/Rad51c/Pitpnc1/Fdxr/Rhbdf2/Dcxr/Sdc1/Fos/Ccnk/Gpx2/Zfp36l1/Ninj1/Nol8/Ankra2/Plk2/F2r/Cgrrf1/Abhd4/Kif13b/Tsc22d1/Rb1/Nudt15/Acvr1…	Apoh/App/Ccnd2/Col3a1/Col5a2/Cxcl5/Fgfr1/Fstl1/Itgav/Jag1/Jag2/Kcnj8/Lpl/Lrpap1/Lum/Msx1/Nrp1/Olr1/Pdgfa/Pf4/Pglyrp1/Postn/Prg2/Ptk2/S100a4/Serpina5/Slco2a1/Spp1/Stc1/Thbd/Timp1/Tnfrsf21/Vav2/Vcan/Vegfa/Vtn	0.336957
23	HALLMARK_GLYCOLYSIS	HALLMARK_GLYCOLYSIS	HALLMARK_GLYCOLYSIS	183	-0.291041	-1.22015	0.0939335	0.204203	0.12897	4008	tags=32%, list=22%, signal=25%	56727/14381/107869/110095/74104/22122/14595/76524/67005/13638/70186/76332/57357/15529/54371/14447/58810/17449/66052/22166/20655/23996/68507/18639/20878/14718/268373/69976/93692/110006/245865/57875/17436/12368/18655/14635/56752/59046/53897/17319/21991/72727/105785/66171/18451/12534/67311/74747/16009/78330/14228/21786/18484/18648/21351/11674/74246/78688/14629	183	Miox/G6pdx/Cth/Pygl/Abcb6/Tsta3/B4galt1/Cln6/Polr3k/Efna3/Fam162a/Cog2/Srd5a3/Sdc2/Chst2/Gapdhs/Akr1a1/Mdh1/Sdhc/Txn1/Sod1/Psmc4/Ppfia4/Pfkfb1/Aurka/Got1/Ppia/Galk2/Glrx/Gusb/Spag4/Angptl4/Me1/Casp6/Pgk1/Galk1/Aldh9a1/Arpp19/Gal3st1/Mif/Tpi1/B3gat3/Kdelr3/Pgls/P4ha1/Cdk1/Nanp/Ddit4/Igfbp3/Ndufv3/Fkbp4/Tff3/Pam/Pgam1/Taldo1/Aldoa/Gale/Nol3/Gclc	59	Rpe/Ankzf1/Gmppa/Gpc1/Aldh9a1/Bpnt1/Idh1/Abcb6/Chpf/Hdlbp/Pam/Cxcr4/Ppfia4/Elf3/Qsox1/Sdhc/Cited2/P4ha1/Dcn/Ddit4/Cdk1/Mif/Gal3st1/Ppia/Egfr/P4ha2/Adora2b/Sox9/Slc25a10/Slc16a3/Pgam2/Igfbp3/Ugp2/Mdh1/Stc2/Rars/Hmmr/Xylt2/Med24/Galk1/Sdc1/Fut8/Dld/Egln3/Pygl/B4galt7/Tgfbi/Glrx/Homer1/Pfkp/Fbp2/Vcan/Kif2a/Ang/Stc1/Ecd/Ero1l/Sdc2/Kdelr3/Bik/Miox/Ext1/Tsta3/Alg1/Pmm2/Pkp2/B4galt4/Sod1/Fam162a/Ndufv3/…	Apoh/App/Ccnd2/Col3a1/Col5a2/Cxcl5/Fgfr1/Fstl1/Itgav/Jag1/Jag2/Kcnj8/Lpl/Lrpap1/Lum/Msx1/Nrp1/Olr1/Pdgfa/Pf4/Pglyrp1/Postn/Prg2/Ptk2/S100a4/Serpina5/Slco2a1/Spp1/Stc1/Thbd/Timp1/Tnfrsf21/Vav2/Vcan/Vegfa/Vtn	0.322404
24	HALLMARK_ESTROGEN_RESPONSE_LATE	HALLMARK_ESTROGEN_RESPONSE_LATE	HALLMARK_ESTROGEN_RESPONSE_LATE	166	-0.298661	-1.23828	0.0998004	0.207917	0.131316	3881	tags=28%, list=21%, signal=22%	20704/225182/12550/110826/22122/67117/15170/53318/17965/20322/17434/105675/68947/67880/68801/12864/54189/20393/12017/212862/15452/209268/27375/17937/64058/15460/114663/67689/19143/71790/243864/21924/233016/11898/50905/76453/21789/56460/14228/14281/16669/21786/17242/22117/74246/16592	166	Serpina1e/Rbbp8/Cdh1/Etfb/Tsta3/Dynlt3/Ptpn6/Pdlim3/Nbl1/Sord/Mocs2/Ppif/Chst8/Dcxr/Elovl5/Cox6c/Rabep1/Sgk1/Bag1/Chpt1/Hprt/Igsf1/Tjp3/Nab2/Perp/Hr/Impa2/Aldh3b1/St14/Anxa9/Mill2/Tnnc1/Blvrb/Ass1/Il17rb/Prss23/Tfpi2/Pkp3/Fkbp4/Fos/Krt19/Tff3/Mdk/Tst/Gale/Fabp5	46	Bcl2/Atp2b4/Lamc2/Perp/Sgk1/Frk/Dnajc12/Tpd52l1/Tjp3/Chpt1/Nab2/Xbp1/Rabep1/Tob1/Rapgefl1/Cdc6/Igfbp4/Mapt/Slc9a3r1/Llgl2/Slc1a4/Slc22a5/Aldh3a2/Top2a/Krt19/St6galnac2/Dcxr/Fos/Batf/Serpina5/Serpina3b/Serpina3n/Id2/Prkar2b/Tspan13/Serpina1e/Serpina3c/Ckb/Xrcc3/Foxc1/Il6st/Mocs2/Cxcl14/Flnb/Ppif/Tnnc1/Egr3/Hr/Farp1/Acox2/Kcnk5/Dlg5/Il17rb/Mettl3/Fdft1/Cox6c/Tsta3/Tst/Emp2/Nrip1/Btg3/Tiam1/Rps6ka2/…	Apoh/App/Ccnd2/Col3a1/Col5a2/Cxcl5/Fgfr1/Fstl1/Itgav/Jag1/Jag2/Kcnj8/Lpl/Lrpap1/Lum/Msx1/Nrp1/Olr1/Pdgfa/Pf4/Pglyrp1/Postn/Prg2/Ptk2/S100a4/Serpina5/Slco2a1/Spp1/Stc1/Thbd/Timp1/Tnfrsf21/Vav2/Vcan/Vegfa/Vtn	0.277108
25	HALLMARK_HEME_METABOLISM	HALLMARK_HEME_METABOLISM	HALLMARK_HEME_METABOLISM	170	-0.288074	-1.20196	0.127202	0.254403	0.160676	3460	tags=22%, list=19%, signal=18%	666468/56224/53415/242705/78369/21672/15199/20341/18022/12227/72674/98766/15288/14651/22275/13349/12215/73046/383295/20617/17524/17896/19044/26357/233016/192657/74309/11433/66171/28199/67151/17025/14317/69754/68591/71946/14629/67182	170	Atg4a/Tspan5/Htatip2/E2f2/Icam4/Prdx2/Hebp1/Selenbp1/Nfe2/Btg2/Adipor1/Ubac1/Hmbs/Hagh/Urod/Ackr1/Bsg/Glrx5/Ypel5/Snca/Mpp1/Myl4/Ppox/Abcg2/Blvrb/Ell2/Osbp2/Acp5/Pgls/Dcaf11/Psmd9/Alad/Ftcd/Fbxo7/Mocos/Endod1/Gclc/Pdzk1ip1	38	Ctse/Adipor1/Slc30a10/Slc30a1/Trak2/Tns1/Abcb6/Tmcc2/Btg2/Nek7/Mgst3/Ppox/Ackr1/Ftcd/Bsg/Fbxo7/Ccdc28a/Foxo3/Nudt4/P4ha2/Acsl6/Map2k3/Vezf1/Atp6v0a1/Myl4/Sec14l1/Narf/Fn3k/Osbp2/Slc22a4/Ctns/Nfe2l1/Ezh1/Slc4a1/Cdc27/Daam1/Glrx5/Mark3/Sptb/Aldh6a1/Ell2/Isca1/Cast/Nnt/Ncoa4/Fbxo34/Lrp10/Dcaf11/Khnyn/Ctsb/Bnip3l/Slc25a37/Dmtn/Xpo7/H1f0/Slc11a2/Nfe2/Tfrc/Cpox/Bach1/Synj1/Agpat4/Hagh/Ccnd3/Kat2b/Lpin2…	Apoh/App/Ccnd2/Col3a1/Col5a2/Cxcl5/Fgfr1/Fstl1/Itgav/Jag1/Jag2/Kcnj8/Lpl/Lrpap1/Lum/Msx1/Nrp1/Olr1/Pdgfa/Pf4/Pglyrp1/Postn/Prg2/Ptk2/S100a4/Serpina5/Slco2a1/Spp1/Stc1/Thbd/Timp1/Tnfrsf21/Vav2/Vcan/Vegfa/Vtn	0.223529
26	HALLMARK_WNT_BETA_CATENIN_SIGNALING	HALLMARK_WNT_BETA_CATENIN_SIGNALING	HALLMARK_WNT_BETA_CATENIN_SIGNALING	39	0.394261	1.28007	0.135827	0.261205	0.164972	4177	tags=33%, list=23%, signal=26%	26965/22419/15182/17869/15214/21414/22059/18132/13380/19664/16842/18222/20602	39	Cul1/Wnt5b/Hdac2/Myc/Hey2/Tcf7/Trp53/Notch4/Dkk1/Rbpj/Lef1/Numb/Ncor2	13	Ncstn/Psen2/Hdac2/Hey2/Trp53/Dvl2/Axin2/Maml1/Tcf7/Kat2a/Hdac5/Adam17/Numb/Ptch1/Myc/Skp2/Csnk1e/Axin1/Ppard/Notch4/Dll1/Fzd8/Dkk1/Notch1/Jag1/Lef1/Hey1/Rbpj/Fzd1/Gnai1/Ncor2/Cul1/Hdac11/Wnt5b/Ccnd2/Peg12/Dkk4/Nkd1/Ctnnb1	Apoh/App/Ccnd2/Col3a1/Col5a2/Cxcl5/Fgfr1/Fstl1/Itgav/Jag1/Jag2/Kcnj8/Lpl/Lrpap1/Lum/Msx1/Nrp1/Olr1/Pdgfa/Pf4/Pglyrp1/Postn/Prg2/Ptk2/S100a4/Serpina5/Slco2a1/Spp1/Stc1/Thbd/Timp1/Tnfrsf21/Vav2/Vcan/Vegfa/Vtn	0.333333
27	HALLMARK_APOPTOSIS	HALLMARK_APOPTOSIS	HALLMARK_APOPTOSIS	153	-0.277972	-1.14479	0.188377	0.340467	0.215032	2909	tags=24%, list=16%, signal=21%	21858/235293/625249/12227/17390/12028/14103/20655/27061/15507/54140/17314/14863/18412/18791/14061/14149/12257/16175/12575/12368/12048/67442/21354/13730/14778/17873/16173/227753/12367/19165/18611/12515/12566/17210/65111/66141	153	Timp2/Sc5d/Gpx4/Btg2/Mmp2/Bax/Fasl/Sod1/Bcap31/Hspb1/Avpr1a/Mgmt/Gstm2/Sqstm1/Plat/F2/Fdxr/Tspo/Il1a/Cdkn1a/Casp6/Bcl2l1/Retsat/Tap1/Emp1/Gpx3/Gadd45b/Il18/Gsn/Casp3/Psen2/Pea15a/Cd69/Cdk2/Mcl1/Dap3/Ifitm3	37	Cflar/Casp8/Rnasel/Btg2/Fasl/Pea15a/Psen2/Tgfb2/Atf3/Ifngr1/Prf1/Gpx4/Gadd45b/Timp3/Dcn/Lum/Avpr1a/Ddit3/Gna15/Erbb3/Cdk2/Ppp3r1/Irf1/Gpx3/Erbb2/Rara/Nefh/Sqstm1/Top2a/Brca1/Fdxr/Timp2/Psen1/Rhob/Nedd9/F2r/Vdac2/Lgals3/Bcl2l2/Clu/Egr3/Dnajc3/Gch1/Bnip3l/Ank/Dap/H1f0/Bik/Tspo/Krt18/Igfbp6/Ptk2/Aifm3/Sod1/Crebbp/Dnm1l/Btg3/App/Sod2/Cdkn1a/Tap1/Ier3/Igf2r/Tnfrsf12a/Tnf/Pdgfrb/Pmaip1/Smad7/Rock1/Etf1…	Apoh/App/Ccnd2/Col3a1/Col5a2/Cxcl5/Fgfr1/Fstl1/Itgav/Jag1/Jag2/Kcnj8/Lpl/Lrpap1/Lum/Msx1/Nrp1/Olr1/Pdgfa/Pf4/Pglyrp1/Postn/Prg2/Ptk2/S100a4/Serpina5/Slco2a1/Spp1/Stc1/Thbd/Timp1/Tnfrsf21/Vav2/Vcan/Vegfa/Vtn	0.24183
28	HALLMARK_COMPLEMENT	HALLMARK_COMPLEMENT	HALLMARK_COMPLEMENT	179	-0.272487	-1.14312	0.190661	0.340467	0.215032	2132	tags=19%, list=12%, signal=17%	110157/13040/12279/18791/14061/16612/12313/17436/12946/16889/20196/26875/18643/12315/17386/14148/12608/13033/17133/56461/67603/80287/21789/77613/54368/14939/12367/16912/19671/66988/13039/20909/70789/54123	179	Raf1/Ctss/C9/Plat/F2/Klk1/Calm1/Me1/Cr1l/Lipa/S100a13/Pclo/Pfn1/Calm3/Mmp13/Fdx1/Cebpb/Ctsd/Maff/Kcnip3/Dusp6/Apobec3/Tfpi2/Prss36/Gp9/Gzmb/Casp3/Psmb9/Rce1/Lap3/Ctsl/Stx4a/Kynu/Irf7	34	Serpinb2/Rabif/Csrp1/Serpinc1/F5/Vcpip1/Fn1/Dock10/Cd55/Cfh/Pla2g4a/Fcer1g/Cd46/Cr1l/Cr2/Fyn/Prep/Spock2/Lta4h/Dusp6/Cpm/Tnfaip3/Sirt6/Prdm4/Dyrk2/Lrp1/Lcp2/Irf1/Pik3r5/Gp1ba/Cdk5r1/Gngt2/Plek/Atox1/Akap10/Pfn1/Ccl5/Grb2/Timp2/Dock4/Psen1/Calm1/Pik3cg/Lgmn/Serpina1e/Actn2/Ctsl/Kif2a/Gzma/Lgals3/Ang/Mmp14/Ctsb/Clu/Gng2/Prkcd/Itih1/Gmfb/Gzmb/Dgkh/Dock9/C9/Cpq/Zfpm2/Maff/Apobec3/Tmprss6/Pdgfb/Cblb/U…	Apoh/App/Ccnd2/Col3a1/Col5a2/Cxcl5/Fgfr1/Fstl1/Itgav/Jag1/Jag2/Kcnj8/Lpl/Lrpap1/Lum/Msx1/Nrp1/Olr1/Pdgfa/Pf4/Pglyrp1/Postn/Prg2/Ptk2/S100a4/Serpina5/Slco2a1/Spp1/Stc1/Thbd/Timp1/Tnfrsf21/Vav2/Vcan/Vegfa/Vtn	0.189944
29	HALLMARK_MYC_TARGETS_V1	HALLMARK_MYC_TARGETS_V1	HALLMARK_MYC_TARGETS_V1	192	0.264209	1.13085	0.201629	0.347637	0.21956	838	tags=7%, list=5%, signal=7%	20810/26965/51797/13690/68988/73192/66973/20174/21781/103136/66942/12237/15182/16647	192	Srm/Cul1/Ctps/Eif4g2/Prpf31/Xpot/Mrps18b/Ruvbl2/Tfdp1/Pwp1/Ddx18/Bub3/Hdac2/Kpna2	14	Hspe1/Eef1b2/Eprs/Cops5/Hspd1/Orc2/Ddx18/Mcm6/Hnrnpu/Hddc2/Hdac2/Snrpd3/Pwp1/Nap1l1/Cdk4/Ptges3/Ddx21/Lsm7/Slc25a3/Cct2/Xpot/Cdk2/Sf3a1/Ppia/Cct4/Xpo1/Rack1/Nhp2/Vdac1/G3bp1/Ywhae/Srsf1/Phb/Psmb3/Psmd3/Pold2/Npm1/Canx/Eif4a1/C1qbp/Kpnb1/Kpna2/Srsf2/Odc1/Psma6/Eif2s1/Ywhaq/Acp1/Ifrd1/Erh/Psma2/Iars/Dek/Fam120a/Nop16/Psmc6/Apex1/Ube2e1/Gnl3/Hnrnpc/Myc/Cyc1/Xrcc6/Hnrnpa1/Cct5/Pabpc1/Eif3d/Ncbp2/Tomm…	Apoh/App/Ccnd2/Col3a1/Col5a2/Cxcl5/Fgfr1/Fstl1/Itgav/Jag1/Jag2/Kcnj8/Lpl/Lrpap1/Lum/Msx1/Nrp1/Olr1/Pdgfa/Pf4/Pglyrp1/Postn/Prg2/Ptk2/S100a4/Serpina5/Slco2a1/Spp1/Stc1/Thbd/Timp1/Tnfrsf21/Vav2/Vcan/Vegfa/Vtn	0.0729167
30	HALLMARK_SPERMATOGENESIS	HALLMARK_SPERMATOGENESIS	HALLMARK_SPERMATOGENESIS	82	-0.306759	-1.14645	0.229958	0.383263	0.242061	3201	tags=30%, list=17%, signal=25%	14823/15482/14447/21821/71838/56088/20878/14866/11861/72391/23980/18952/17773/22335/17349/12467/109979/17288/68961/18005/12534/14056/12442/12686/21351	82	Grm8/Hspa1l/Gapdhs/Ift88/Phf7/Psmg1/Aurka/Gstm5/Arl4a/Cdkn3/Pebp1/Sept4/Mtnr1a/Vdac3/Mlf1/Cct6b/Art3/Mep1b/Phkg2/Nek2/Cdk1/Ezh2/Ccnb2/Elovl3/Taldo1	25	Agfg1/Nek2/Tsn/Map7/Sirt1/Cdk1/Pcsk4/Gpr182/Sept4/Ace/Pgs1/Nf2/Nefh/Cct6b/Pomc/Hspa2/Zc2hc1c/Zc3h14/Lpin1/Arl4a/Rad17/Cdkn3/Parp2/Ift88/Phf7/Rpl39l/Rfc4/Psmg1/Hspa1l/Pacrg/Tcp11/Mep1b/Camk4/Slc12a2/Pias2/Elovl3/Cnih2/Tle4/Ide/Mllt10/Strbp/Stam2/Ncaph/Nphp1/Aurka/Hspa4l/Mlf1/She/Gstm5/Oaz3/Spata6/Mtor/Slc2a5/Mast2/Kif2c/Tekt2/Art3/Chfr/Dbf4/Pebp1/Cftr/Acrbp/Grm8/Braf/Ezh2/Il12rb2/Gmcl1/Gsg1/Tulp2/…	Apoh/App/Ccnd2/Col3a1/Col5a2/Cxcl5/Fgfr1/Fstl1/Itgav/Jag1/Jag2/Kcnj8/Lpl/Lrpap1/Lum/Msx1/Nrp1/Olr1/Pdgfa/Pf4/Pglyrp1/Postn/Prg2/Ptk2/S100a4/Serpina5/Slco2a1/Spp1/Stc1/Thbd/Timp1/Tnfrsf21/Vav2/Vcan/Vegfa/Vtn	0.304878
31	HALLMARK_COAGULATION	HALLMARK_COAGULATION	HALLMARK_COAGULATION	128	-0.275184	-1.1091	0.247505	0.388277	0.245227	2977	tags=27%, list=16%, signal=23%	14360/20193/14118/17390/11812/110382/69379/76467/14060/66383/11905/21824/56744/56213/236733/12279/18791/14061/20196/17392/13038/17133/15451/17385/67603/67898/76453/21789/227753/54368/11806/17175/13039/12334/20692	128	Fyn/S100a1/Fbn1/Mmp2/Apoc1/C8b/C8g/Msrb2/F13b/Iscu/Serpinc1/Thbd/Pf4/Htra1/Usp11/C9/Plat/F2/S100a13/Mmp3/Ctsk/Maff/Hpn/Mmp11/Dusp6/Pef1/Prss23/Tfpi2/Gsn/Gp9/Apoa1/Masp2/Ctsl/Capn2/Sparc	35	Serpinb2/Ctse/Rabif/Csrp1/F13b/Serpinc1/Klf7/Fn1/Cfh/Capn2/Fyn/Prep/Timp3/Lta4h/Dusp6/Mmp11/Lrp1/Gp1ba/Itgb3/Plek/Sparc/Dusp14/Pecam1/Crip2/Lgmn/Serpina1e/F2rl2/F12/Ctsl/Itga2/Plau/Arf4/Ang/Mmp14/Ctsb/Clu/Cpb2/Acox2/Itih1/Bmp1/Dct/C9/Cpq/Maff/Tmprss6/Pdgfb/Rapgef3/Hrg/Pros1/Plg/C2/C3/Proc/Mbl2/Anxa1/Gda/Cpn1/Msrb2/Gsn/Thbs1/Hnf4a/Mmp9/C8g/Dpp4/Serping1/F2/Fbn1/Thbd/P2ry1/Ctso/Fgg/Fga/S100a13/Ctsk…	Apoh/App/Ccnd2/Col3a1/Col5a2/Cxcl5/Fgfr1/Fstl1/Itgav/Jag1/Jag2/Kcnj8/Lpl/Lrpap1/Lum/Msx1/Nrp1/Olr1/Pdgfa/Pf4/Pglyrp1/Postn/Prg2/Ptk2/S100a4/Serpina5/Slco2a1/Spp1/Stc1/Thbd/Timp1/Tnfrsf21/Vav2/Vcan/Vegfa/Vtn	0.273438
32	HALLMARK_EPITHELIAL_MESENCHYMAL_TRANSITION	HALLMARK_EPITHELIAL_MESENCHYMAL_TRANSITION	HALLMARK_EPITHELIAL_MESENCHYMAL_TRANSITION	165	-0.263384	-1.09129	0.248497	0.388277	0.245227	4776	tags=32%, list=26%, signal=24%	14825/16772/21810/16416/16419/18793/20377/12843/17022/12064/54725/109624/12153/12816/234407/12832/17220/16476/17181/71665/333883/14118/17390/67305/16774/19736/56213/407800/22004/21345/14609/58859/21826/23876/17392/18542/320712/16008/98932/11489/19035/20649/65112/16852/17873/11475/16009/21789/20971/12406/11803/18858/20692	165	Cxcl1/Lama1/Tgfbi/Itgb3/Itgb5/Plaur/Sfrp1/Col1a2/Lum/Bdnf/Cadm1/Cald1/Bmp1/Col12a1/Colgalt1/Col5a2/Mcm7/Jun/Matn2/Fuca1/Cd59b/Fbn1/Mmp2/Gpx7/Lama3/Rgs4/Htra1/Ecm2/Tpm2/Tagln/Gja1/Efemp2/Thbs2/Fbln5/Mmp3/Pcolce/Abi3bp/Igfbp2/Myl9/Adam12/Ppib/Sntb1/Pmepa1/Lgals1/Gadd45b/Acta2/Igfbp3/Tfpi2/Sdc4/Serpinh1/Aplp1/Pmp22/Sparc	53	Dst/Igfbp2/Gpc1/Fmod/Copa/Col5a2/Fn1/Serpine2/Col6a3/Lamc2/Lamc1/Qsox1/Prrx1/Rgs4/Gja1/Gadd45b/Timp3/Dcn/Lum/Tnfaip3/Lama2/Col6a2/Glipr1/Lrp1/Slit3/Pmp22/Col1a1/Igfbp4/Itgb3/Igfbp3/Sgcd/Pdlim4/Sparc/Sdc1/Rhob/Id2/Fbln5/Inhba/Ecm2/Tgfbi/Gas1/Vcan/Itga2/Nid2/Wnt5a/Mmp14/Loxl2/Fermt2/Bmp1/Dab2/Matn2/Lgals1/Fbln1/Cdh6/Basp1/Tnfrsf11b/Sntb1/Itga5/Snai2/Itgb5/Mylk/Fstl1/Abi3bp/Lrrc15/Lama1/Thbs2/Tnfrsf…	Apoh/App/Ccnd2/Col3a1/Col5a2/Cxcl5/Fgfr1/Fstl1/Itgav/Jag1/Jag2/Kcnj8/Lpl/Lrpap1/Lum/Msx1/Nrp1/Olr1/Pdgfa/Pf4/Pglyrp1/Postn/Prg2/Ptk2/S100a4/Serpina5/Slco2a1/Spp1/Stc1/Thbd/Timp1/Tnfrsf21/Vav2/Vcan/Vegfa/Vtn	0.321212
33	HALLMARK_TNFA_SIGNALING_VIA_NFKB	HALLMARK_TNFA_SIGNALING_VIA_NFKB	HALLMARK_TNFA_SIGNALING_VIA_NFKB	193	0.250957	1.07423	0.28252	0.428061	0.270354	2335	tags=22%, list=13%, signal=19%	56722/71712/20304/18792/56066/11797/19698/18787/14066/227659/104681/192656/21353/15894/20527/15945/18037/21929/50723/55991/24088/12443/15980/20303/17869/20656/15939/106628/21928/18034/12505/19219/18227/16193/56193/26397/12702/16362/11796/57783/21664/21926	193	Litaf/Dram1/Ccl5/Plau/Cxcl11/Birc2/Relb/Serpine1/F3/Slc2a6/Slc16a6/Ripk2/Tank/Icam1/Slc2a3/Cxcl10/Nfkbie/Tnfaip3/Icosl/Panx1/Tlr2/Ccnd1/Ifngr2/Ccl4/Myc/Sod2/Ier5/Trip10/Tnfaip2/Nfkb2/Cd44/Ptger4/Nr4a2/Il6/Plek/Map2k3/Socs3/Irf1/Birc3/Tnip1/Phlda1/Tnf	42	Cflar/Ackr3/Serpinb2/Serpinb8/Ptgs2/Lamb3/Msc/Btg2/Ier5/Atf3/G0s2/Sgk1/Egr2/Icosl/Gadd45b/Btg1/Atp2b1/Phlda1/Tnfaip3/Marcks/Dram1/Lif/Il12b/Gfpt2/Irf1/Map2k3/Per1/Ccl12/Ccl4/Eif1/Stat5a/Sphk1/Plek/Rel/Sqstm1/Tnip1/Kdm6b/Ccl5/Slc16a6/Socs3/Nampt/Fos/Tnfaip2/Rhob/Id2/Nfkbia/Klf6/Inhba/Edn1/Cd83/Ninj1/Plk2/Il6st/Tubb2a/Nfil3/F2rl1/Plau/Egr3/Tsc22d1/Gch1/Gpr183/Trib1/Myc/Maff/Nr4a1/Ptger4/Il7r/Klf10/…	Apoh/App/Ccnd2/Col3a1/Col5a2/Cxcl5/Fgfr1/Fstl1/Itgav/Jag1/Jag2/Kcnj8/Lpl/Lrpap1/Lum/Msx1/Nrp1/Olr1/Pdgfa/Pf4/Pglyrp1/Postn/Prg2/Ptk2/S100a4/Serpina5/Slco2a1/Spp1/Stc1/Thbd/Timp1/Tnfrsf21/Vav2/Vcan/Vegfa/Vtn	0.217617
34	HALLMARK_DNA_REPAIR	HALLMARK_DNA_REPAIR	HALLMARK_DNA_REPAIR	144	0.260257	1.06598	0.32998	0.485265	0.306483	2055	tags=12%, list=11%, signal=11%	67996/80905/66679/94223/66653/75062/14156/19891/68219/13870/98053/57278/67967/194309/22059/56626/70239/14884	144	Srsf6/Polh/Rae1/Dgcr8/Brf2/Sf3a3/Fen1/Rpa2/Nudt21/Ercc1/Gtf2f1/Bcam/Pold3/Vps37d/Trp53/Poll/Gtf3c5/Gtf2h1	18	Ercc5/Mpc2/Rev3l/Zwint/Gpx4/Prim1/Polr2e/Mpg/Trp53/Supt4a/Guk1/Polr2a/Nt5c/Cant1/Pde6g/Alyref/Cmpk2/Ercc8/Ccno/Rala/Pnp2/Gmpr2/Dad1/Polr2k/Zfp707/Polr2f/Rbx1/Tarbp2/Rrm2b/Adcy6/Aaas/Ercc4/Polr2h/Ncbp2/Hcls1/Cox17/Dgcr8/Mrpl40/Rfc4/Umps/Gtf2h5/Nme3/Nelfe/Nme4/Znrd1/Polh/Polr1c/Gtf2f1/Polr2d/Ercc3/Dctn4/Rnmt/Pold4/Ddb1/Pola2/Sac3d1/Polr2g/Fen1/Stx3/Ak3/Poll/Edf1/Ak1/Ssrp1/Cstf3/Rad51/Dut/Itpa/Srsf6…	Apoh/App/Ccnd2/Col3a1/Col5a2/Cxcl5/Fgfr1/Fstl1/Itgav/Jag1/Jag2/Kcnj8/Lpl/Lrpap1/Lum/Msx1/Nrp1/Olr1/Pdgfa/Pf4/Pglyrp1/Postn/Prg2/Ptk2/S100a4/Serpina5/Slco2a1/Spp1/Stc1/Thbd/Timp1/Tnfrsf21/Vav2/Vcan/Vegfa/Vtn	0.125
35	HALLMARK_TGF_BETA_SIGNALING	HALLMARK_TGF_BETA_SIGNALING	HALLMARK_TGF_BETA_SIGNALING	51	0.312993	1.0687	0.348162	0.497375	0.314132	1363	tags=14%, list=7%, signal=13%	21803/26409/18787/21812/12166/15980/11798	51	Tgfb1/Map3k7/Serpine1/Tgfbr1/Bmpr1a/Ifngr2/Xiap	7	Bmpr2/Sptbn1/Ppm1a/Id2/Ltbp2/Arid4b/Bmpr1a/Klf10/Ifngr2/Rab31/Tgif1/Apc/Smad7/Ppp1ca/Eng/Thbs1/Slc20a1/Bmp2/Fkbp1a/Id1/Cdk9/Acvr1/Pmepa1/Skil/Trim33/Bcar3/Ube2d3/Wwtr1/Map3k7/Tgfbr1/Id3/Hdac1/Ski/Ncor2/Serpine1/Smurf1/Hipk2/Tgfb1/Ppp1r15a/Tjp1/Furin/Cdkn1c/Cdh1/Fnta/Smad1/Junb/Rhoa/Ctnnb1/Smad3/Smad6/Xiap	Apoh/App/Ccnd2/Col3a1/Col5a2/Cxcl5/Fgfr1/Fstl1/Itgav/Jag1/Jag2/Kcnj8/Lpl/Lrpap1/Lum/Msx1/Nrp1/Olr1/Pdgfa/Pf4/Pglyrp1/Postn/Prg2/Ptk2/S100a4/Serpina5/Slco2a1/Spp1/Stc1/Thbd/Timp1/Tnfrsf21/Vav2/Vcan/Vegfa/Vtn	0.137255
36	HALLMARK_IL2_STAT5_SIGNALING	HALLMARK_IL2_STAT5_SIGNALING	HALLMARK_IL2_STAT5_SIGNALING	176	-0.246343	-1.03132	0.373281	0.518446	0.327439	1630	tags=22%, list=9%, signal=20%	12577/320204/18438/16407/57319/12524/11746/20193/19734/625249/68043/12522/11905/23849/11861/17117/12048/69305/16153/16188/67547/13730/18030/68151/269378/667034/17133/18451/17873/57436/19012/319625/17988/12367/11803/66395/170743/55932/66141	176	Cdkn1c/Etfbkmt/P2rx4/Itgae/Smpdl3a/Cd86/Anxa4/S100a1/Rgs16/Gpx4/Eef1akmt1/Cd83/Serpinc1/Klf6/Arl4a/Amacr/Bcl2l1/Dcps/Il10/Il3ra/Slc39a8/Emp1/Nfil3/Wls/Ahcy/Pnp2/Maff/P4ha1/Gadd45b/Gabarapl1/Plpp1/Galm/Ndrg1/Casp3/Aplp1/Ahnak/Tlr7/Gbp3/Ifitm3	39	Il1r2/Il1rl1/Il18r1/Bmpr2/Icos/Il10/Rgs16/Serpinc1/Sell/Selp/Cd48/Batf3/Fam126b/Ikzf2/Bcl2/Mapkapk2/Rabgap1l/Pou2f1/Uck2/Plagl1/Ifngr1/Smpdl3a/P4ha1/Gpx4/Gadd45b/Phlda1/Enpp1/Col6a1/Ckap4/Socs2/Ikzf4/Lif/Xbp1/Spred2/Adam19/Eno3/Itgae/Myo1c/Ptrh2/Cdc6/Cdc42se2/Cd79b/Odc1/Prkch/Batf/Gpr65/Rhob/Ahr/Arl4a/Klf6/Irf4/Cd83/F2rl2/Plpp1/Serpinb6a/Nfil3/Ptch1/Il3ra/Ptger2/Pnp2/Eef1akmt1/Amacr/Myc/Maff/Ndrg…	Apoh/App/Ccnd2/Col3a1/Col5a2/Cxcl5/Fgfr1/Fstl1/Itgav/Jag1/Jag2/Kcnj8/Lpl/Lrpap1/Lum/Msx1/Nrp1/Olr1/Pdgfa/Pf4/Pglyrp1/Postn/Prg2/Ptk2/S100a4/Serpina5/Slco2a1/Spp1/Stc1/Thbd/Timp1/Tnfrsf21/Vav2/Vcan/Vegfa/Vtn	0.221591
37	HALLMARK_KRAS_SIGNALING_UP	HALLMARK_KRAS_SIGNALING_UP	HALLMARK_KRAS_SIGNALING_UP	173	-0.246688	-1.03053	0.384766	0.519954	0.328392	3135	tags=21%, list=17%, signal=17%	11491/71665/19662/19734/57349/17872/66066/11846/74114/16913/13040/93692/12223/18791/57875/223272/101772/66795/23882/13730/170757/16002/21788/14012/17385/20614/12267/67603/16009/107527/67888/23957/14396/78937/12142/14020	173	Adam17/Fuca1/Rbp4/Rgs16/Ppbp/Ppp1r15a/Gng11/Arg1/Crot/Psmb8/Ctss/Glrx/Btc/Plat/Angptl4/Itgbl1/Ano1/Atg10/Gadd45g/Emp1/Adgrl4/Igf2/Tfpi/Mpzl2/Mmp11/Snap25/C3ar1/Dusp6/Igfbp3/Il1rl2/Tmem100/Nr0b2/Gabra3/Avl9/Prdm1/Evi5	36	Ly96/Il1rl2/Pigr/Tnnt2/Ptgs2/Rgs16/Tor1aip2/Sdccag8/Cxcr4/Cfhr1/Cfh/Rabgap1l/Prrx1/Fcer1g/Hsd11b1/G0s2/Akap12/Map7/Itgb2/Dusp6/Ptprr/Tnfaip3/Arg1/Prdm1/Hkdc1/Mmp11/Nr1h4/Lif/Ikzf1/Flt4/Gfpt2/Tmem100/Mmd/Ace/Sox9/Igfbp3/Dock2/Jup/Pecam1/Cbx8/Etv1/Serpina3b/Serpina3n/Mycn/Trib2/Adam17/Id2/Hdac9/Tspan13/Zfp277/Nin/Plek2/Serpina3c/Inhba/Gadd45g/Glrx/F13a1/Atg10/F2rl1/Ptcd2/Map3k1/Itga2/Plau/Fgf9/Cab3…	Apoh/App/Ccnd2/Col3a1/Col5a2/Cxcl5/Fgfr1/Fstl1/Itgav/Jag1/Jag2/Kcnj8/Lpl/Lrpap1/Lum/Msx1/Nrp1/Olr1/Pdgfa/Pf4/Pglyrp1/Postn/Prg2/Ptk2/S100a4/Serpina5/Slco2a1/Spp1/Stc1/Thbd/Timp1/Tnfrsf21/Vav2/Vcan/Vegfa/Vtn	0.208092
38	HALLMARK_NOTCH_SIGNALING	HALLMARK_NOTCH_SIGNALING	HALLMARK_NOTCH_SIGNALING	30	0.318636	0.980037	0.473684	0.623269	0.393643	1243	tags=10%, list=7%, signal=9%	26965/22418/12443	30	Cul1/Wnt5a/Ccnd1	3	Fzd7/Fzd5/Psen2/Fbxw11/Skp1a/Kat2a/Prkca/Wnt5a/Rbx1/Hes1/St3gal6/Ppard/Dll1/Notch3/Tcf7l2/Dtx4/Notch1/Jag1/Aph1a/Heyl/Dtx2/Lfng/Fzd1/Dtx1/Cul1/Wnt2/Arrb1/Psenen/Ccnd1/Sap30	Apoh/App/Ccnd2/Col3a1/Col5a2/Cxcl5/Fgfr1/Fstl1/Itgav/Jag1/Jag2/Kcnj8/Lpl/Lrpap1/Lum/Msx1/Nrp1/Olr1/Pdgfa/Pf4/Pglyrp1/Postn/Prg2/Ptk2/S100a4/Serpina5/Slco2a1/Spp1/Stc1/Thbd/Timp1/Tnfrsf21/Vav2/Vcan/Vegfa/Vtn	0.1
39	HALLMARK_ANDROGEN_RESPONSE	HALLMARK_ANDROGEN_RESPONSE	HALLMARK_ANDROGEN_RESPONSE	95	-0.252491	-0.97147	0.509595	0.653327	0.412627	1407	tags=24%, list=8%, signal=22%	14595/208715/12007/71817/20322/68801/16613/13714/20393/15446/16612/14375/16691/13167/192657/65112/21807/19012/17988/18048/16669/12010/231070	95	B4galt1/Hmgcs1/Azgp1/Tmem50a/Sord/Elovl5/Klk1b11/Elk4/Sgk1/Hpgd/Klk1/Xrcc6/Krt8/Dbi/Ell2/Pmepa1/Tsc22d1/Plpp1/Ndrg1/Klk1b4/Krt19/B2m/Insig1	23	Xrcc5/Acsl3/Elk4/Dbi/Uap1/Akap12/Map7/Sgk1/Arid5b/Appbp2/Krt19/Dnajb9/Actn1/Ptpn21/Akt1/Idi1/Ell2/Plpp1/Hmgcs1/Cdc14b/Iqgap2/Hmgcr/Ngly1/Zmiz1/Ncoa4/Tsc22d1/Ptk2b/Abcc4/Selenop/Lifr/Ank/H1f0/Xrcc6/Ndrg1/Slc38a2/Krt8/Adamts1/Tmprss2/Ccnd3/Ube2i/Fkbp5/Srf/Vapa/Myl12a/Srp19/Tnfaip8/Slc26a2/Lman1/Fads1/Rrp12/Itgav/B2m/Sord/Mertk/Adrm1/Stk39/Pmepa1/Zbtb10/Sec24d/Tpd52/Gnai3/Pdlim5/Ube2j1/Dhcr24/B4galt…	Apoh/App/Ccnd2/Col3a1/Col5a2/Cxcl5/Fgfr1/Fstl1/Itgav/Jag1/Jag2/Kcnj8/Lpl/Lrpap1/Lum/Msx1/Nrp1/Olr1/Pdgfa/Pf4/Pglyrp1/Postn/Prg2/Ptk2/S100a4/Serpina5/Slco2a1/Spp1/Stc1/Thbd/Timp1/Tnfrsf21/Vav2/Vcan/Vegfa/Vtn	0.242105
40	HALLMARK_MTORC1_SIGNALING	HALLMARK_MTORC1_SIGNALING	HALLMARK_MTORC1_SIGNALING	189	-0.222835	-0.941747	0.587891	0.734863	0.464124	4659	tags=33%, list=25%, signal=25%	12450/26441/59027/65972/14433/17216/15926/22359/12767/20893/14782/26754/13595/56529/14381/107869/66427/17252/208715/20867/12301/20322/104112/17113/100678/235293/68801/17872/12227/19167/23996/15452/56088/15288/103733/20878/15528/14718/268373/12449/93692/59029/18412/14149/17436/14227/12575/18655/11951/228775/21991/18030/68465/667034/228026/18451/74747/110391/12406/11674/14629/231070	189	Ccng1/Psma4/Nampt/Ifi30/Gapdh/Mcm2/Idh1/Vldlr/Cxcr4/Bhlhe40/Gsr/Cops5/Ebp/Sec11a/G6pdx/Cth/Cyb5b/Rdh11/Hmgcs1/Stip1/Cacybp/Sord/Acly/M6pr/Psph/Sc5d/Elovl5/Ppp1r15a/Btg2/Psma3/Psmc4/Hprt/Psmg1/Hmbs/Tubg1/Aurka/Hspe1/Got1/Ppia/Ccnf/Glrx/Psmd14/Sqstm1/Fdxr/Me1/Fkbp2/Cdkn1a/Pgk1/Atp5g1/Trib3/Tpi1/Nfil3/Adipor2/Pnp2/Pdk1/P4ha1/Ddit4/Qdpr/Serpinh1/Aldoa/Gclc/Insig1	62	Hspe1/Acsl3/Uchl5/Fam129a/Eprs/Cops5/Hspd1/Idh1/Igfbp5/Tuba4a/Actr3/Cxcr4/Btg2/Cacybp/P4ha1/Ppa1/Itgb2/Txnrd1/Lta4h/Ddit3/Ddit4/Pfkl/Tbk1/Shmt2/Xbp1/Ykt6/Ppia/Rab1a/Map2k3/Acaca/Tubg1/Psme3/Nmt1/Psmd12/Slc9a3r1/Pno1/Actr2/Slc1a4/Ccng1/Sqstm1/Canx/Hspa4/Tmem97/Atp5g1/Acly/Fdxr/Rrm2/Nampt/Psma3/Ifrd1/Egln3/Atp6v1d/Rdh11/Lgmn/Wars/Idi1/Glrx/Dhfr/Hmgcs1/Ssr1/Eef1e1/Nfil3/Polr3g/Hmgcr/Psmc6/Pnp2/Stc1/…	Apoh/App/Ccnd2/Col3a1/Col5a2/Cxcl5/Fgfr1/Fstl1/Itgav/Jag1/Jag2/Kcnj8/Lpl/Lrpap1/Lum/Msx1/Nrp1/Olr1/Pdgfa/Pf4/Pglyrp1/Postn/Prg2/Ptk2/S100a4/Serpina5/Slco2a1/Spp1/Stc1/Thbd/Timp1/Tnfrsf21/Vav2/Vcan/Vegfa/Vtn	0.328042
41	HALLMARK_APICAL_JUNCTION	HALLMARK_APICAL_JUNCTION	HALLMARK_APICAL_JUNCTION	166	0.216919	0.914676	0.668663	0.799916	0.50521	3383	tags=22%, list=18%, signal=18%	12561/19354/105827/16398/19264/17395/15894/20963/23880/19261/11652/98053/12560/21838/22323/20416/23912/93737/12741/18383/54353/64540/20312/22784/11502/60533/60363/18190/99151/18016/19094/54420/17698/65970/244864/12552/12740	166	Cdh4/Rac2/Amigo2/Itga2/Ptprc/Mmp9/Icam1/Syk/Fyb/Sirpa/Akt2/Gtf2f1/Cdh3/Thy1/Vasp/Shc1/Rhof/Pard6g/Cldn5/Tnfrsf11b/Skap2/Tspan4/Cx3cl1/Slc30a3/Adam9/Cd274/Cldn15/Nrxn2/Cercam/Nf2/Mapk11/Cldn8/Msn/Lima1/Layn/Cdh11/Cldn4	37	Adam23/Arpc2/Speg/Nectin4/Lamb3/Cd34/Irs1/Nfasc/Ptprc/Lamc2/Mpzl1/Akt3/Epb41l2/Cnn2/Gamt/Egfr/Myh10/Cldn7/Nf1/Grb7/Tubg1/Wnk4/Itgb4/Baiap2/Nf2/Adra1b/Alox8/Nlgn2/Pfn1/Itga3/Jup/Icam2/Pecam1/Actg1/Mpp5/Evl/Actn1/Syk/Tgfbi/Actn2/Rasa1/Vcan/Itga2/Vcl/Sorbs3/Bmp1/Fyb/Cdh6/Tnfrsf11b/Ptk2/Myh9/Rac2/Mapk11/Amigo2/Lima1/Cldn5/Dlg1/Cd86/Nectin3/Adamts5/Cldn8/Cldn14/Cldn6/Pkd1/Mapk14/Mapk13/Dhx16/Crb3/Nrtn…	Apoh/App/Ccnd2/Col3a1/Col5a2/Cxcl5/Fgfr1/Fstl1/Itgav/Jag1/Jag2/Kcnj8/Lpl/Lrpap1/Lum/Msx1/Nrp1/Olr1/Pdgfa/Pf4/Pglyrp1/Postn/Prg2/Ptk2/S100a4/Serpina5/Slco2a1/Spp1/Stc1/Thbd/Timp1/Tnfrsf21/Vav2/Vcan/Vegfa/Vtn	0.222892
42	HALLMARK_MITOTIC_SPINDLE	HALLMARK_MITOTIC_SPINDLE	HALLMARK_MITOTIC_SPINDLE	193	0.213651	0.914536	0.691057	0.799916	0.50521	6305	tags=40%, list=34%, signal=27%	76932/16569/70099/18536/171207/16319/76073/16593/259279/83767/226525/269587/233276/104252/236266/23912/219103/277360/22350/192176/18817/11855/71819/72776/223254/192786/13589/12125/12190/16800/104027/223697/12488/12009/105988/73804/109934/16573/192662/69632/16798/16551/17925/108000/16571/19765/66615/67141/13006/18764/238130/270058/19687/211673/18080/74018/237860/13518/56705/13383/544817/14086/1304…	193	Arfip2/Kif3b/Smc4/Pcm1/Arhgap4/Incenp/Pcgf5/Klc1/Tubgcp3/Wasf1/Rasal2/Epb41/Tubgcp5/Cdc42ep2/Alms1/Rhof/Cenpj/Prex1/Ezr/Flna/Plk1/Arhgap5/Kif23/Sass6/Farp1/Rapgef6/Mapre1/Bcl2l11/Brca2/Arhgef2/Synpo/Sun2/Cd2ap/Cep131/Espl1/Kif2c/Abr/Kif5b/Arhgdia/Arhgef12/Lats1/Kif11/Myo9b/Cenpf/Kif4/Ralbp1/Atg4b/Fbxo5/Smc3/Pkd2/Dock4/Map1s/Rfc1/Arfgef1/Nin/Als2/Ssh2/Dst/Ranbp9/Dlg1/Arhgap27/Fscn1/Cttn/Sos1/Cep19…	78	Dst/Nck2/Atg4b/Clasp1/Rab3gap1/Arl8a/Kifap3/Cdc42bpa/Nek2/Arfgef1/Als2/Tuba4a/Rasal2/Cenpf/Lats1/Katna1/Epb41l2/Wasf1/Bcr/Fgd6/Fbxo5/Marcks/Cdk1/Pcnt/Ccdc88a/Shroom1/Rapgef6/Llgl1/Myh10/Ywhae/Ssh2/Nf1/Tubd1/Sept9/Birc5/Tbcd/Sptbn1/Dock2/Cntrob/Pafah1b1/Gemin4/Abr/Dynll2/Top2a/Arhgap27/Cdc27/Cdc42ep4/Cep131/Arhgdia/Csnk1d/Kif3c/Dock4/Arhgap5/Arf6/Dync1h1/Klc1/Rapgef5/Nin/Net1/Nedd9/Ranbp9/Cep72/Ra…	Apoh/App/Ccnd2/Col3a1/Col5a2/Cxcl5/Fgfr1/Fstl1/Itgav/Jag1/Jag2/Kcnj8/Lpl/Lrpap1/Lum/Msx1/Nrp1/Olr1/Pdgfa/Pf4/Pglyrp1/Postn/Prg2/Ptk2/S100a4/Serpina5/Slco2a1/Spp1/Stc1/Thbd/Timp1/Tnfrsf21/Vav2/Vcan/Vegfa/Vtn	0.404145
43	HALLMARK_HEDGEHOG_SIGNALING	HALLMARK_HEDGEHOG_SIGNALING	HALLMARK_HEDGEHOG_SIGNALING	30	0.276069	0.849113	0.692008	0.799916	0.50521	1967	tags=13%, list=11%, signal=12%	21838/15214/18187/21885	30	Thy1/Hey2/Nrp2/Tle1	4	Nrp2/Hey2/Gli1/Nf1/Cdk5r1/Rtn1/Ptch1/Rasa1/Dpysl2/Myh9/Celsr1/Ets2/Plg/Vegfa/Vldlr/Slit1/Ldb1/Hey1/Cntfr/Tle1/Cdk6/Ache/Shh/Adgrg1/Thy1/Tle3/Pml/L1cam/Ophn1/Amot	Apoh/App/Ccnd2/Col3a1/Col5a2/Cxcl5/Fgfr1/Fstl1/Itgav/Jag1/Jag2/Kcnj8/Lpl/Lrpap1/Lum/Msx1/Nrp1/Olr1/Pdgfa/Pf4/Pglyrp1/Postn/Prg2/Ptk2/S100a4/Serpina5/Slco2a1/Spp1/Stc1/Thbd/Timp1/Tnfrsf21/Vav2/Vcan/Vegfa/Vtn	0.133333
44	HALLMARK_UV_RESPONSE_DN	HALLMARK_UV_RESPONSE_DN	HALLMARK_UV_RESPONSE_DN	127	-0.218885	-0.884128	0.714286	0.799916	0.50521	4538	tags=24%, list=25%, signal=18%	57312/12843/12064/69219/23797/22359/20893/57265/11787/12832/15893/268977/12306/15529/11746/14360/17755/236915/19736/17314/20273/14609/23876/14773/21788/109552/12286/18858/231070/19252	127	Mrps31/Col1a2/Bdnf/Ddah1/Akt3/Vldlr/Bhlhe40/Fzd2/Apbb2/Col5a2/Ica1/Ltbp1/Anxa2/Sdc2/Anxa4/Fyn/Map1b/Arhgef9/Rgs4/Mgmt/Scn8a/Gja1/Fbln5/Grk5/Tfpi/Sri/Cacna1a/Pmp22/Insig1/Dusp1	30	Cdc42bpa/Phf3/Fhl2/Col5a2/Igfbp5/Irs1/Atp2b4/Nek7/Lamc1/Rgs4/Akt3/Cited2/Fyn/Gja1/Atp2b1/Syne1/Efemp1/Adora2b/Pmp22/Col1a1/Spop/Erbb2/Fzd2/Itgb3/Prkca/Sipa1l1/Mta1/Prkar2b/Ptpn21/Fbln5/Wdr37/Cdk13/Atxn1/Aggf1/Map1b/Zmiz1/Sfmbt1/Nr1d2/Kcnma1/Bmpr1a/Dab2/Sdc2/Myc/Scn8a/Nipbl/Abcc1/Snai2/Dlg1/Dyrk1a/Kalrn/Runx1/Scaf8/Synj2/Mapk14/Ltbp1/Prkce/Dusp1/Ptprm/Pdgfrb/Smad7/Nr3c1/Vldlr/Pten/Add3/Grk5/Gcnt1/…	Apoh/App/Ccnd2/Col3a1/Col5a2/Cxcl5/Fgfr1/Fstl1/Itgav/Jag1/Jag2/Kcnj8/Lpl/Lrpap1/Lum/Msx1/Nrp1/Olr1/Pdgfa/Pf4/Pglyrp1/Postn/Prg2/Ptk2/S100a4/Serpina5/Slco2a1/Spp1/Stc1/Thbd/Timp1/Tnfrsf21/Vav2/Vcan/Vegfa/Vtn	0.23622
45	HALLMARK_PI3K_AKT_MTOR_SIGNALING	HALLMARK_PI3K_AKT_MTOR_SIGNALING	HALLMARK_PI3K_AKT_MTOR_SIGNALING	96	0.229704	0.888343	0.719925	0.799916	0.50521	982	tags=9%, list=5%, signal=9%	11651/17346/21937/26409/11840/266632/18036/56480/26377	96	Akt1/Mknk1/Tnfrsf1a/Map3k7/Arf1/Irak4/Nfkbib/Tbk1/Dapp1	9	Pikfyve/Cab39/Ralb/Actr3/Cxcr4/Fasl/Ube2n/Cdk4/Ddit3/Stat2/Cdk1/Mknk2/Tbk1/Cdk2/Egfr/Mapk9/Map2k3/Acaca/Map2k6/Rptor/Actr2/Sqstm1/Il4/Arf1/Pfn1/Cltc/Dusp3/Grb2/Arhgdia/Akt1/Adcy2/Cab39l/Mapk8/Irak4/Atf1/Sla/Prkag1/Mapk1/Ap2m1/Gsk3b/Tiam1/Cdkn1a/Tsc2/Csnk2b/Camk4/Smad2/Ppp1ca/Cfl1/Gna14/Pten/Grk2/Mapkap1/Pdk1/Plcb1/Plcg1/Ywhab/Traf2/Trib3/E2f1/Rit1/Them4/Ngf/Vav3/Pla2g12a/Ube2d3/Eif4e/Dapp1/Map3k7…	Apoh/App/Ccnd2/Col3a1/Col5a2/Cxcl5/Fgfr1/Fstl1/Itgav/Jag1/Jag2/Kcnj8/Lpl/Lrpap1/Lum/Msx1/Nrp1/Olr1/Pdgfa/Pf4/Pglyrp1/Postn/Prg2/Ptk2/S100a4/Serpina5/Slco2a1/Spp1/Stc1/Thbd/Timp1/Tnfrsf21/Vav2/Vcan/Vegfa/Vtn	0.09375
46	HALLMARK_PANCREAS_BETA_CELLS	HALLMARK_PANCREAS_BETA_CELLS	HALLMARK_PANCREAS_BETA_CELLS	18	-0.293445	-0.791871	0.775161	0.842566	0.532147	6342	tags=50%, list=35%, signal=33%	27058/16658/13482/23797/77766/56529/69019/20813/103988	18	Srp9/Mafb/Dpp4/Akt3/Elp4/Sec11a/Spcs1/Srp14/Gck	9	Srp9/Akt3/Gck/Spcs1/Lmo2/Pax6/Stxbp1/Dpp4/Elp4/Srp14/Foxa2/Mafb/Slc2a2/Foxo1/Pklr/Hnf1a/Sec11a/Pak3	Apoh/App/Ccnd2/Col3a1/Col5a2/Cxcl5/Fgfr1/Fstl1/Itgav/Jag1/Jag2/Kcnj8/Lpl/Lrpap1/Lum/Msx1/Nrp1/Olr1/Pdgfa/Pf4/Pglyrp1/Postn/Prg2/Ptk2/S100a4/Serpina5/Slco2a1/Spp1/Stc1/Thbd/Timp1/Tnfrsf21/Vav2/Vcan/Vegfa/Vtn	0.5
47	HALLMARK_PROTEIN_SECRETION	HALLMARK_PROTEIN_SECRETION	HALLMARK_PROTEIN_SECRETION	92	0.213266	0.812424	0.860735	0.914329	0.577471	4857	tags=29%, list=26%, signal=22%	26951/11840/56041/56494/66251/213827/70349/228960/77929/20333/107767/108664/50797/69608/26413/70361/108123/11487/54214/11303/12725/110651/11773/20479/68365/69162/24045	92	Zw10/Arf1/Uso1/Gosr2/Arfgap3/Arcn1/Copb1/Stx16/Yipf6/Sec22b/Scamp1/Atp6v1h/Copb2/Sec24d/Mapk1/Lman1/Napg/Adam10/Golga4/Abca1/Clcn3/Rps6ka3/Ap2m1/Vps4b/Rab14/Sec31a/Scamp3	27	Atp6v1h/Dst/Vamp4/Arfgef1/Pam/Vps4b/Stx7/Tspan8/Cd63/Mon2/Ykt6/Egfr/Ap2b1/Arf1/Cltc/Tom1l1/Gosr2/Tmx1/Tmed10/Galc/Ap3b1/Scamp1/Cln5/Krt18/Arfgap3/Mapk1/Ap2m1/Sod1/Dnm1l/Rab5a/Igf2r/Ap3s1/Snx2/Napg/Lman1/Gbf1/Sgms1/Stam/Snap23/Ergic3/Arfgef2/Rab22a/Stx16/Gnas/Rab14/Scamp3/Anp32e/Sec22b/Sec24d/Tpd52/Arfip1/Vps45/Atp1a1/Rab2a/Clta/Ppt1/Abca1/Stx12/Kif1b/Vamp3/Rer1/Uso1/Tmed2/Sec31a/Cav2/M6pr/Sspn/Be…	Apoh/App/Ccnd2/Col3a1/Col5a2/Cxcl5/Fgfr1/Fstl1/Itgav/Jag1/Jag2/Kcnj8/Lpl/Lrpap1/Lum/Msx1/Nrp1/Olr1/Pdgfa/Pf4/Pglyrp1/Postn/Prg2/Ptk2/S100a4/Serpina5/Slco2a1/Spp1/Stc1/Thbd/Timp1/Tnfrsf21/Vav2/Vcan/Vegfa/Vtn	0.293478
48	HALLMARK_APICAL_SURFACE	HALLMARK_APICAL_SURFACE	HALLMARK_APICAL_SURFACE	35	0.222616	0.707071	0.877756	0.914329	0.577471	5536	tags=37%, list=30%, signal=26%	14462/21838/14252/20312/14451/11487/13640/73379/230872/17096/140494/12189/54670	35	Gata3/Thy1/Flot2/Cx3cl1/Gas1/Adam10/Efna5/Dcbld2/Crocc/Lyn/Atp6v0a4/Brca1/Atp8b1	13	Pkhd1/Akap7/Rtn4rl1/Flot2/Slc2a4/Brca1/Gas1/Il2rb/Scube1/Dcbld2/App/Mdga1/Efna5/Atp8b1/Afap1l2/Gata3/Mal/Ncoa6/Sulf2/Gstm5/Cd160/Lyn/Tmem8b/B4galt1/Pcsk9/Crocc/Hspb1/Ephb4/Atp6v0a4/Adipor2/Plaur/Cx3cl1/Thy1/Adam10/Shroom2	Apoh/App/Ccnd2/Col3a1/Col5a2/Cxcl5/Fgfr1/Fstl1/Itgav/Jag1/Jag2/Kcnj8/Lpl/Lrpap1/Lum/Msx1/Nrp1/Olr1/Pdgfa/Pf4/Pglyrp1/Postn/Prg2/Ptk2/S100a4/Serpina5/Slco2a1/Spp1/Stc1/Thbd/Timp1/Tnfrsf21/Vav2/Vcan/Vegfa/Vtn	0.371429
49	HALLMARK_ESTROGEN_RESPONSE_EARLY	HALLMARK_ESTROGEN_RESPONSE_EARLY	HALLMARK_ESTROGEN_RESPONSE_EARLY	172	-0.19192	-0.800475	0.917969	0.936703	0.591602	2020	tags=13%, list=11%, signal=11%	67815/27375/14609/15460/78914/67689/71790/243864/381269/99929/16691/233016/99543/50905/22248/76453/116914/14228/14281/16669/21786/71946	172	Sec14l2/Tjp3/Gja1/Hr/Nadsyn1/Aldh3b1/Anxa9/Mill2/Mreg/Tiparp/Krt8/Blvrb/Olfml3/Il17rb/Unc119/Prss23/Slc19a2/Fkbp4/Fos/Krt19/Tff3/Endod1	22	Mlph/Fcmr/Lad1/Slc19a2/Mybl1/Fhl2/Mreg/Rab17/Bcl2/Inhbb/Elf3/Frk/Gja1/Tpd52l1/Tjp3/Chpt1/Tbc1d30/Xbp1/Adcy1/Cldn7/Mybbp1a/Unc119/Tob1/Rapgefl1/Rara/Igfbp4/Mapt/Slc9a3r1/Sec14l2/Slc1a4/Stc2/Wwc1/Slc22a5/Akap1/Med24/Krt19/Cant1/Fasn/Fos/Bcl11b/Asb13/Foxc1/Il6st/Tubb2b/Elovl2/Rhobtb3/Mast4/Flnb/Ppif/Egr3/Hr/Elf1/Farp1/Kcnk5/Il17rb/Sh3bp5/Fdft1/Deptor/Myc/Syngr1/Krt18/Klf10/Sybu/Celsr1/Krt8/Abat/Hes1…	Apoh/App/Ccnd2/Col3a1/Col5a2/Cxcl5/Fgfr1/Fstl1/Itgav/Jag1/Jag2/Kcnj8/Lpl/Lrpap1/Lum/Msx1/Nrp1/Olr1/Pdgfa/Pf4/Pglyrp1/Postn/Prg2/Ptk2/S100a4/Serpina5/Slco2a1/Spp1/Stc1/Thbd/Timp1/Tnfrsf21/Vav2/Vcan/Vegfa/Vtn	0.127907
50	HALLMARK_ANGIOGENESIS	HALLMARK_ANGIOGENESIS	HALLMARK_ANGIOGENESIS	30	0.195243	0.600514	0.957115	0.957115	0.604494	1775	tags=10%, list=10%, signal=9%	21857/17701/94185	30	Timp1/Msx1/Tnfrsf21	3	Col5a2/Lum/Vtn/Apoh/Serpina5/Vcan/Stc1/Ptk2/Fstl1/App/Tnfrsf21/Vegfa/Itgav/Vav2/Jag1/Thbd/Postn/Cxcl5/Pf4/Lrpap1/Msx1/Pdgfa/Ccnd2/Olr1/Kcnj8/Pglyrp1/Fgfr1/Lpl/Slco2a1/Timp1	Apoh/App/Ccnd2/Col3a1/Col5a2/Cxcl5/Fgfr1/Fstl1/Itgav/Jag1/Jag2/Kcnj8/Lpl/Lrpap1/Lum/Msx1/Nrp1/Olr1/Pdgfa/Pf4/Pglyrp1/Postn/Prg2/Ptk2/S100a4/Serpina5/Slco2a1/Spp1/Stc1/Thbd/Timp1/Tnfrsf21/Vav2/Vcan/Vegfa/Vtn	0.1
